# Supplementary material for: Dodecin as carrier protein for immunizations and bioengineering applications
Source: Springer Nature journal article supplement (doi:10.1038/s41598-020-69990-0), 2020-08-06
Supplement: MOESM1 [file 41598_2020_69990_MOESM1_ESM.pdf]

# Supporting Information:

## Dodecin as carrier protein for immunizations and bioengineering applications

*Authors: Florian Bourdeaux<sup>a</sup>, Yannick Kopp<sup>b</sup>, Julia Lautenschläger<sup>a</sup>, Ines Gößner<sup>a</sup>, Hüseyin Besir<sup>c</sup>, R. Martin Vabulas<sup>d</sup>, Martin Grininger<sup>a,\*</sup>*

### Author affiliations:

(a) Institute of Organic Chemistry and Chemical Biology, Buchmann Institute for Molecular Life Sciences, Cluster of Excellence for Macromolecular Complexes, Goethe University Frankfurt, Max-von-Laue-Str. 15, D-60438 Frankfurt am Main, Germany

(b) Institute of Biophysical Chemistry, Buchmann Institute for Molecular Life Sciences, Goethe University Frankfurt, Max-von-Lauer Str. 15, D-60438 Frankfurt am Main, Germany

(c) European Molecular Biology Laboratory, 69117 Heidelberg, Germany; currently PROGEN Biotechnik GmbH, 69123 Heidelberg, Germany

(d) Charité - Universitätsmedizin Berlin, Institute of Biochemistry, Charitéplatz 1, D-10117 Berlin

\*Corresponding author: [grininger@chemie.uni-frankfurt.de](mailto:grininger@chemie.uni-frankfurt.de)

### Contents:

|       |       |                           |
|-------|-------|---------------------------|
| Page  | 2     | Abbreviations             |
| Pages | 3-14  | Supporting Figures S1-S13 |
| Pages | 16-23 | Supporting Table S1-S2    |
| Page  | 24    | Literature                |

**Abbreviations:**

ACP, acyl carrier protein; AB, antibody; BSA, bovine serum albumin; Catcher, small protein fold (SpyCatcher or SnoopCatcher) that binds and reacts with Tag; CDS, coding sequence; CellSig., Cell Signaling Technology; CHIP, C-terminus of heat shock cognate 70 interacting protein; EU, endotoxin units; FMN, riboflavin-5'-phosphate; GFP, green fluorescent protein; GSG, PAS, PAS2 GPAS, GPAS2, PASG, PAS2G, linker systems, see Table 1; HB-EGF, proheparin-binding EGF-like growth factor; HSP, heat shock protein; IPTG, isopropyl- $\beta$ -D-thiogalactopyranoside; KLH, keyhole limpet hemocyanin; L, Ladder (only used in figures); LAL, *Limulus* amoebocyte lysate; Lys., lysate (only used in figures); MAP, multiple antigen peptides; mCHIP, middle fragment of C-terminus of heat shock cognate 70 interacting protein; MG, proteasome inhibitor MG-132; *mm*ACP, *Mus musculus* acyl carrier protein; msfGFP, monomeric superfolder green fluorescent protein; *mt*Dod, *Mycobacterium tuberculosis* dodecin; *mt*Dod(WT), *Mycobacterium tuberculosis* dodecin wild type; OD600, optical density at 600 nm; OE, over expressing cells; RSA, rabbit serum albumin; SCBT, Santa Cruz Biotechnology; *se*ACP, *Saccharopolyspora erythraea* acyl carrier protein; SEC, size exclusion chromatography; Sfp, 4'-phosphopantetheine transferase from *Bacillus subtilis*; Sigma, Sigma-Aldrich; SnpC, SnoopCatcher; SnpT, SnoopTag; SpyC, SpyCatcher; SpyT, SpyTag; SZ, SYNZIP domain; Tag, small peptide sequence that interacts with Catcher's (SpyTag or SnoopTag); TB, terrific broth; TBS, Tris-HCl buffered saline; TBST, Tris-HCl buffered saline with Tween-20; TT, tetanus toxoid; VLP, virus-like particle.

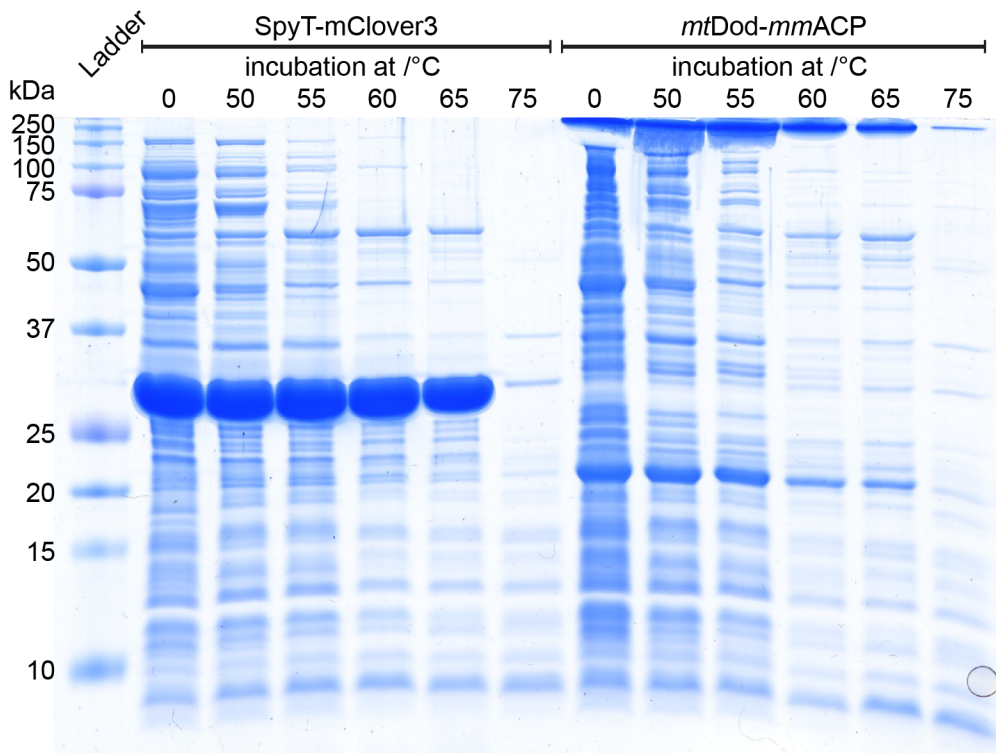

**Fig. S1:** SDS-PAGE gel of supernatant after heat denaturation of lysate at different temperatures. Standard loading buffer (pH 6.8, 2.5% SDS) was used for sample preparation with 15 min heat treatment (95 °C). Lysate samples were incubated at depicted temperatures for 25 min and aggregated protein was removed by centrifugation (15.000 rcf, 10 min). After centrifugation, for all samples, the same amount of supernatant was mixed with loading buffer, incubated as stated and loaded onto the gel. Left: Bands show heat denaturation of SpyT-mClover3 at different temperatures. At 60 °C, most *E. coli* proteins are aggregated and removed by centrifugation, while SpyT-mClover (thick band above 25 kDa) is still present in high concentration. At 75 °C, also SpyT-mClover is denatured and aggregated, as indicated by the intensity decrease of the respective band. Right: Supernatant samples of heat denaturation of *mtDod-mmACP*. Since standard loading buffer is not able to denature the dodecamer (only a small fraction of the dodecamer denatures under these conditions), the dodecamer hardly migrated in the gel, as indicated by bands at very top edge of the gel. The band representing the *mtDod-mmACP* monomer is visible slightly above 20 kDa. At 60 °C, the intensity of the *mtDod-mmACP* band decreases (best observable for the monomer band slightly above 20 kDa), indicating that *mtDod-mmACP* starts to precipitate during the heat denaturing step. At 75 °C, only weakly stained bands *mtDod-mmACP* are visible, showing that most *mtDod-mmACP* precipitated at this temperature and was removed by centrifugation (see Fig. S7 for SDS-PAGE of the pellet).

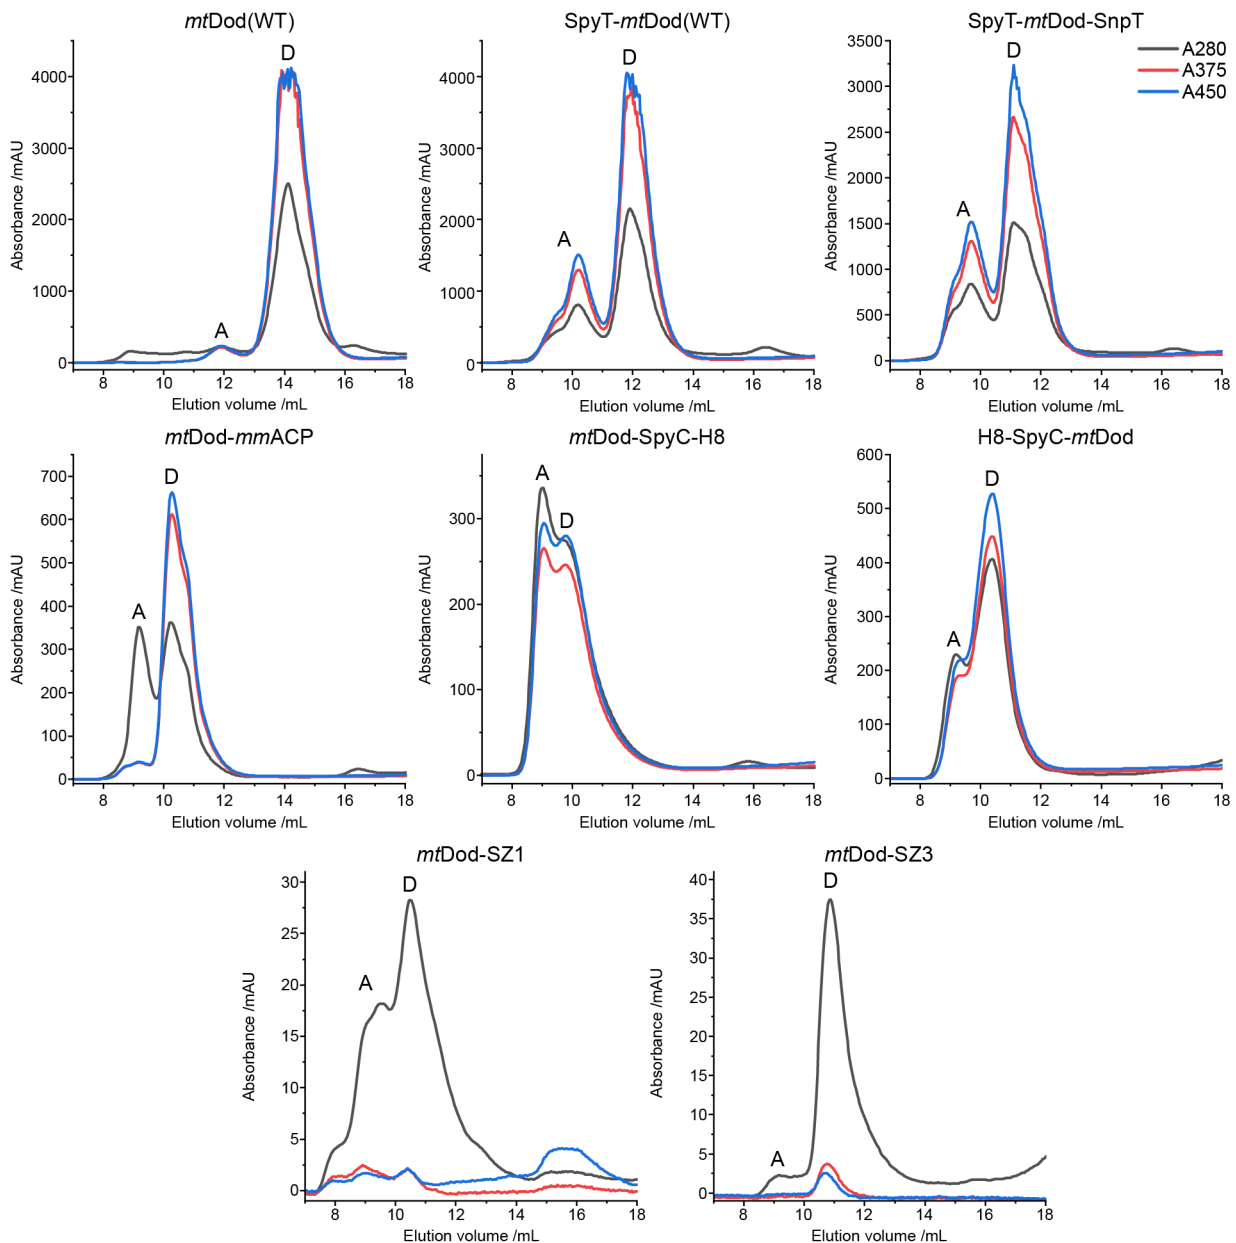

**Fig. S2:** SEC chromatograms of various *mtDod* constructs. Column: Superdex 200 increase 10/300. A: Peak/peaks representing aggregates. D: Peak representing the dodecamer. Top row: Example of *mtDod* constructs purified by the heat denaturation protocol. The second DMSO precipitation step was used to concentrate samples as high as possible (buffer added in small portions, until the pellet was nearly fully dissolved but not completely). Under these high concentrations, some *mtDod* constructs seem to form aggregates that still bind FMN. Chromatogram of *mtDod-mmACP* purified by the heat denaturation strategy shows a prominent aggregation peak at about 9 mL. Chromatograms of refolded *mtDod* SpyC constructs form FMN binding dodecamers, but tend to aggregate (peak at about 9 mL). H8-SpyC-*mtDod* seems to have lower aggregation tendencies than *mtDod-SpyC-H8* (the separation of dodecamer and aggregates was not possible). *MtDod* SYNZIP constructs were refolded and purified without additional FMN. The high aggregation tendencies of SYNZIP constructs (especially *mtDod-SZ1*) made the purification of higher amounts challenging, as samples tended to suddenly precipitate during concentration and filtration at higher concentrations.



*mtDod*-msfGFP-H8

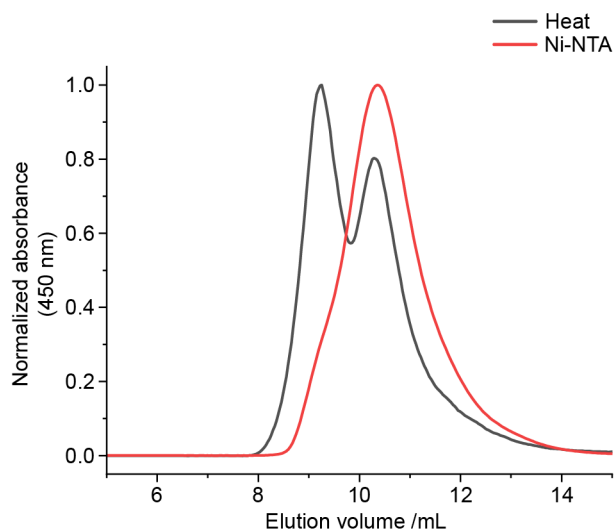

*mtDod* *mmACP* constructs

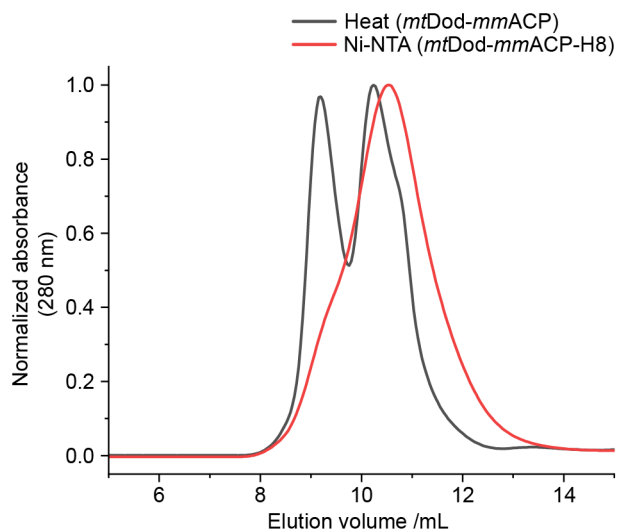

**Fig. S3:** Comparison of SEC chromatograms of *mtDod*-msfGFP-H8 and *mtDod* *mmACP* constructs purified by Ni-NTA affinity chromatography and/or by heat denaturation. In both cases, the Ni-NTA affinity chromatography purification caused less aggregation. However, dodecameric fractions of *mtDod*-msfGFP-H8 and *mtDod*-*mmACP* could also be received from the heat denaturation protocol.

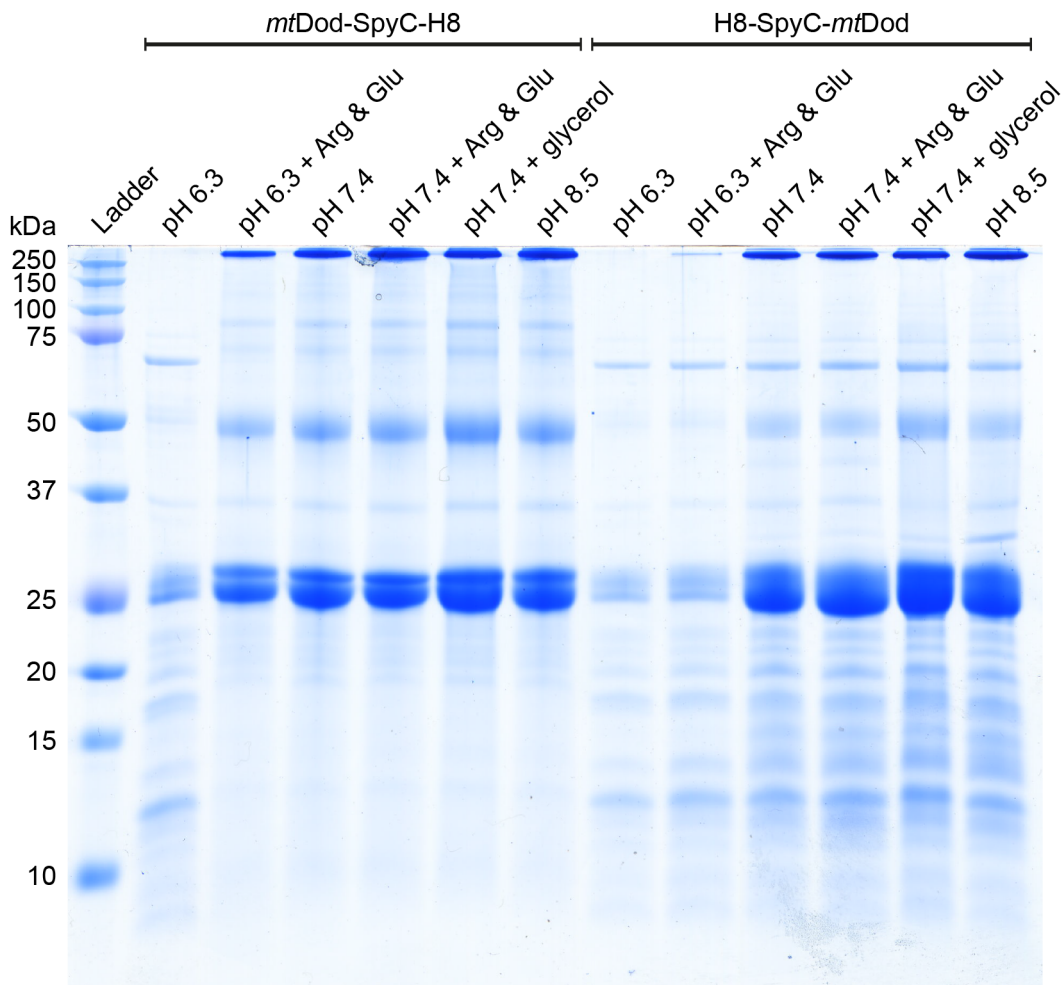

**Fig. S4:** SDS-PAGE gel of *mtDod* SpyC constructs refolded under different conditions via dialysis. Acidic loading buffer used for sample preparation contained 50 mM acetic acid, which did not allow a full denaturation of the dodecamer. General buffer solution for refolding (final concentrations): 100 mM NaCl, 25 mM Na<sub>2</sub>HPO<sub>4</sub> and 25 mM boric acid. The pH was adjusted to the shown values with HCl or NaOH. Refolding additives were 50 mM arginine and 50 mM glutamic acid (Arg & Glu)<sup>1</sup> and 20% glycerol (glycerol). Except under slightly acidic conditions, refolding of *mtDod* SpyC constructs is possible. Arginine and glutamic acid seem to be beneficial for refolding (clearly seen for *mtDod*-SpyC-H8 at pH 6.3). Overall, the best tested condition seems to be pH 7.4 with 20% glycerol (highest band intensity and lowest amount of precipitate was observed).

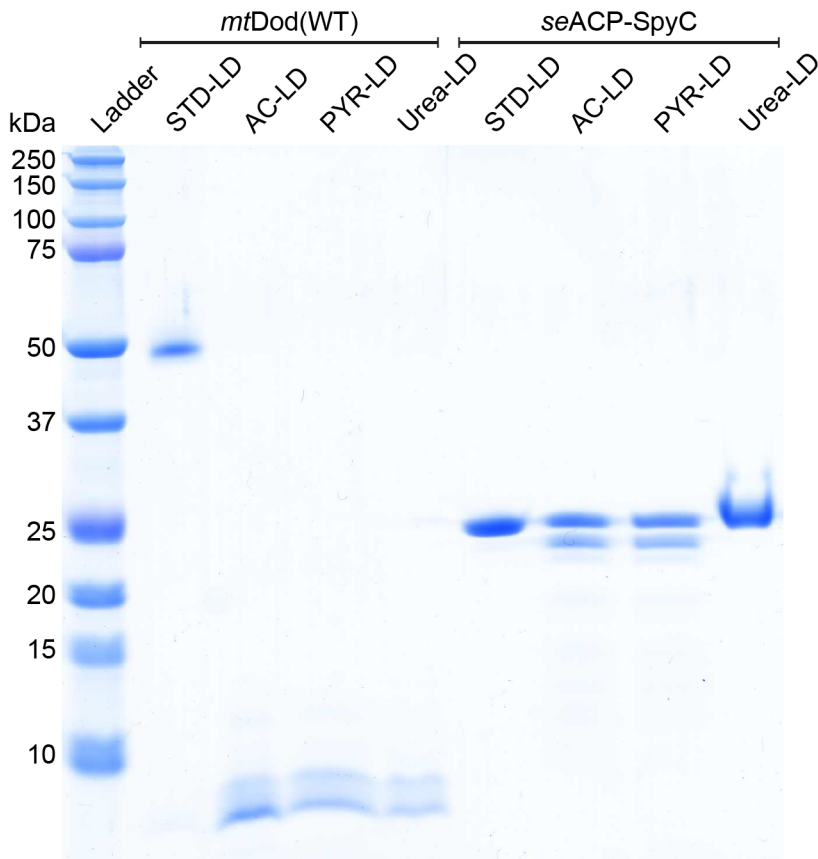

**Fig. S5:** SDS-PAGE gel for comparison of loading buffers. *MtDod*(WT) and *seACP-SpyC* were used. STD-LD: standard loading buffer (denaturing step conditions: pH 6.8, 2.5% SDS). AC-LD: Acetic acid two-component loading buffer (denaturing step conditions: pH < 5.0, 3.3% SDS). PYR-LD: Pyridine two-component loading buffer (denaturing step conditions: pH < 5.0, 3.3% SDS). Urea-LD: standard loading buffer with 8 M urea (denaturing step conditions: pH 6.8, 2.5% SDS, 8 M Urea). All samples were denatured for 5 min at 95 °C. After denaturation, the second component buffer was added to the two-component loading buffer samples (final pH, SDS and glycerol content as in standard loading buffer). All loading buffers, except the standard loading buffer, are able to denature the *MtDod*(WT) dodecamer, indicated by the monomer band (below 10 kDa). The smearing double bands seem to be an artefact of this specific SDS-PAGE gel, as also the lower molecular weight bands of the ladder show this phenomenon. The gel shows that the *MtDod* dodecamer tolerates SDS, as long the conditions do not become too acidic. For *seACP-SpyC*, the acidic denaturing conditions cause the appearance of a band at lower molecular weight. The formation of this band is also temperature dependent. Heat treatment at 60°C with acidic loading buffer did not cause the formation of double bands (see Fig 5).

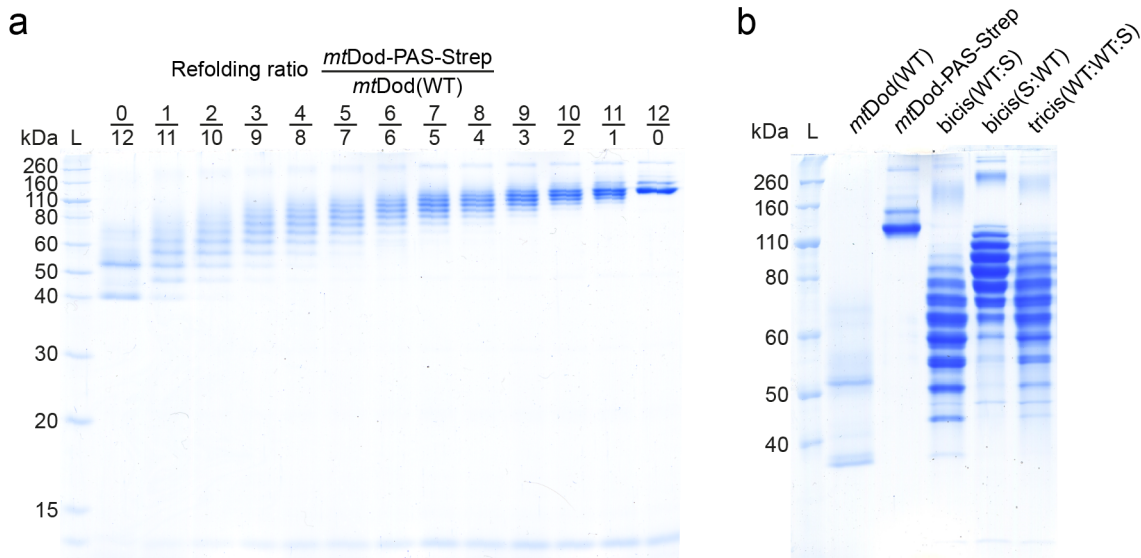

**Fig. S6:** Uncropped SDS-PAGE gel of Fig. 3. L: Ladder. S: *mtDod*-PAS-Strep. WT: *mtDod*(WT). a) Uncropped SDS-PAGE gel of Fig. 3 a. Heterododecamers obtained by refolding *mtDod*(WT) and *mtDod*-PAS-Strep at different ratios. Bands below 15 kDa represent the *mtDod*-PAS-Strep monomer (9916 Da), while *mtDod*(WT) monomer (7497 Da) migrated through the full gel so that no bands are visible. b) Full length gel image of Fig. 3 b. Heterododecamers formed during polycistronic expression of *mtDod*(WT) and *mtDod*-PAS-Strep. Gene order of polycistronic expression vectors given in brackets (bicis: bicistronic(first gene : second gene); tricis: tricistronic(first gene : second gene : third gene)). For improved separation of higher molecular weight bands running time was prolonged to about 4 h. The monomers of *MtDod* constructs and lower weight proteins migrated through the entire gel so that protein and ladder bands (below 40 kDa) are not visible. The gel is cropped at the right to remove not relevant samples.

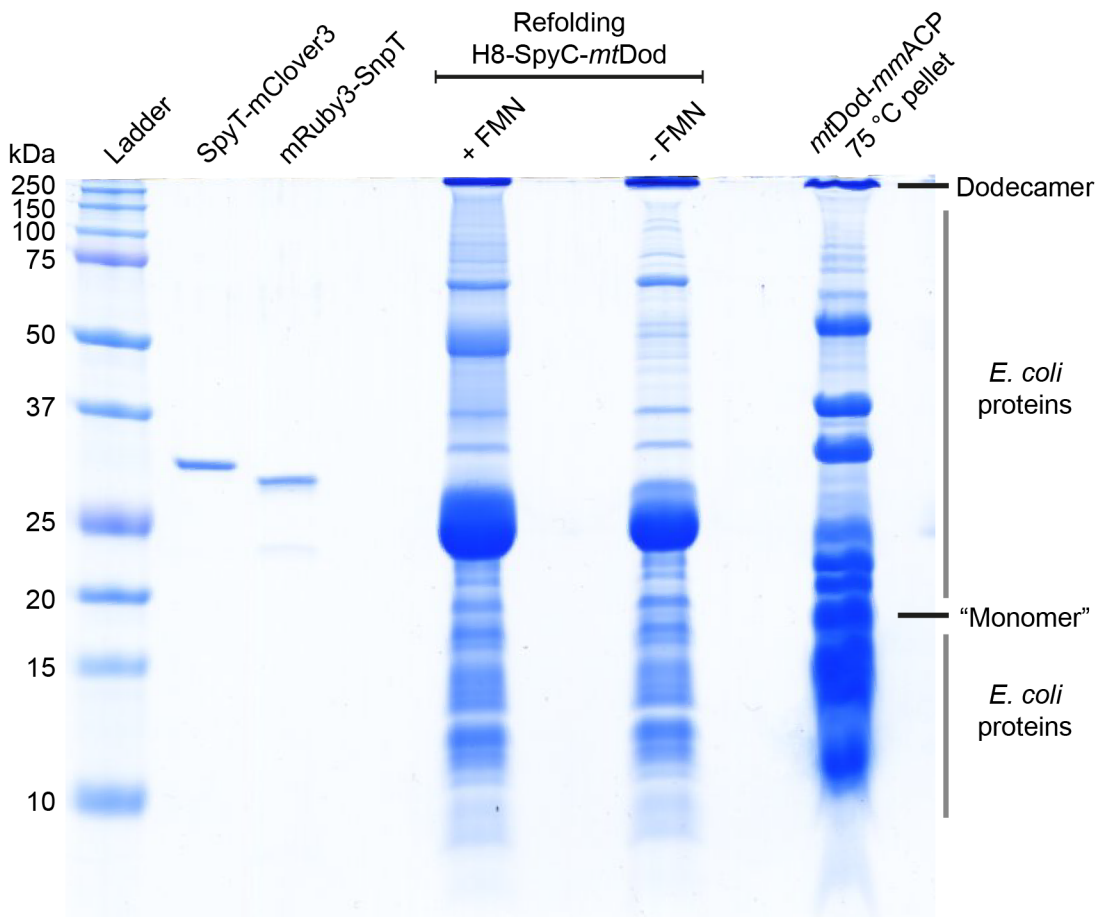

**Fig. S7:** SDS-PAGE gel of *mtDod-mmACP* precipitating during heat denaturation and other samples. Standard loading buffer was used to preserve dodecameric species. Right sample: Cytosol containing *mtDod-mmACP* was incubated at 75 °C for 25 min and aggregated proteins were pelleted by centrifugation (15.000 rcf, 10 min). A small amount of the pellet was dissolved in standard SDS loading buffer at 95 °C (about 15 min) and loaded to the gel. In the stained gel, a strong band at high molecular weight (top of the gel, labelled dodecamer) is visible indicating intact dodecamer of *mtDod-mmACP*. The potential band representing the monomer of *mtDod-mmACP* (about 18 kDa) cannot be selected with certainty (most fitting band labelled with “Monomer”). Other bands are the during the heat incubation denatured *E. coli* proteins resolubilized with SDS (grey bar). Other samples: SpyT-Clover-H8 and mRuby3-SnpT: pooled SEC fractions (purified by a heat denaturation based protocol). Refolding H8-SpyC-*mtDod*: first refolding attempt of H8-SpyC-*mtDod* in our standard buffer, aggregated protein was removed by centrifugation (15,000 rcf, 10 min).

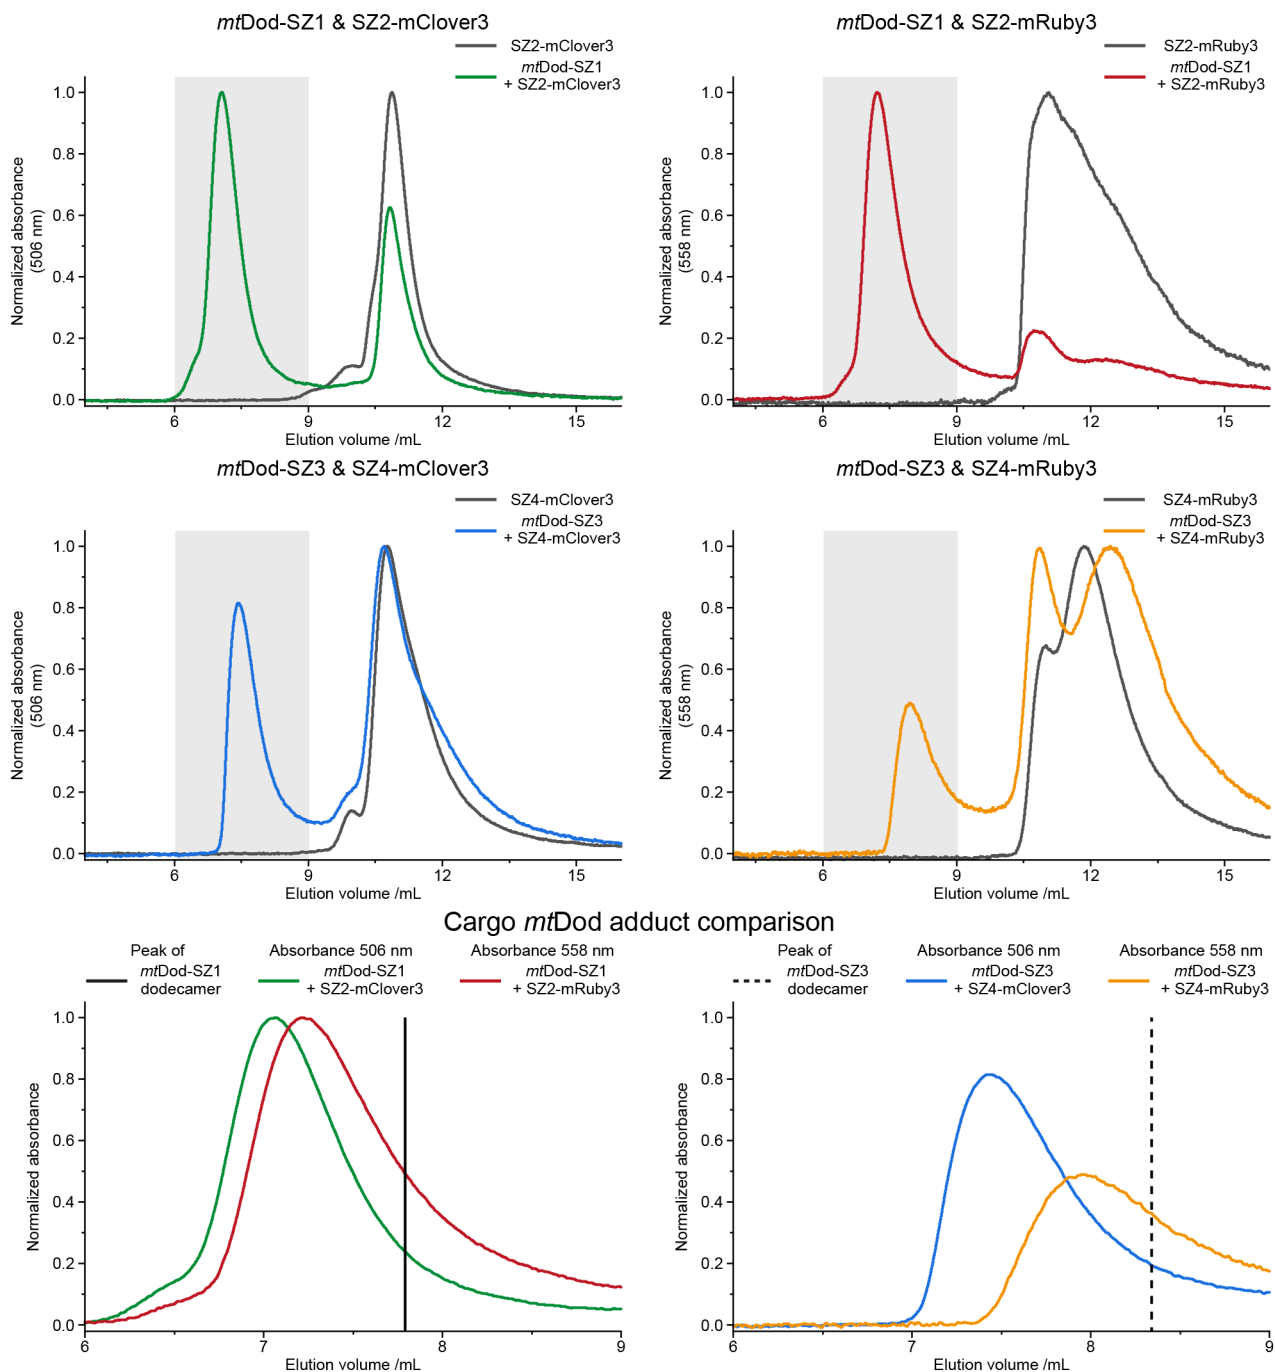

**Fig. S8:** HPLC-SEC chromatograms of *mtDod* SYNZIP constructs and SYNZIP fluorescence protein constructs. Chromophore absorption of mRuby3 or mClover3 constructs was measured to observe the formation of high molecular weight species. Peaks of the formed adducts (grey highlighted areas) are overlaid in the bottom row. For comparison, elution volumes of the SYNZIP *mtDod* constructs are shown as a straight (*mtDod*-SZ1) or dashed (*mtDod*-SZ3) line (based on absorbance at 280 nm). While for all combinations adduct species were observed, there is a clear difference in dodecamer to cargo composition. The SZ1-SZ2 pair overall performed better than the SZ3-SZ4 pair. For adduct formation, equimolar amounts of carrier and cargo (67  $\mu$ M) were used and first incubated at 37  $^{\circ}$ C for 1 h and then on ice for 1 h. Single protein samples were treated the same way. As reaction buffer and running buffer, the standard dodecin buffer (300 mM NaCl, 5 mM MgCl<sub>2</sub> and 20 mM Tris-HCl (pH 7.4)) was used. Samples were filtered (0.22  $\mu$ m) and 8  $\mu$ L were loaded. Runs were performed at 0.3 mL/min and 22  $^{\circ}$ C. Used column: bioZen 1.8  $\mu$ m SEC-3 (300  $\times$  4.6 mm, Phenomenex). Absorbance at 280 nm, 375 nm, 506 nm and 558 nm was measured.

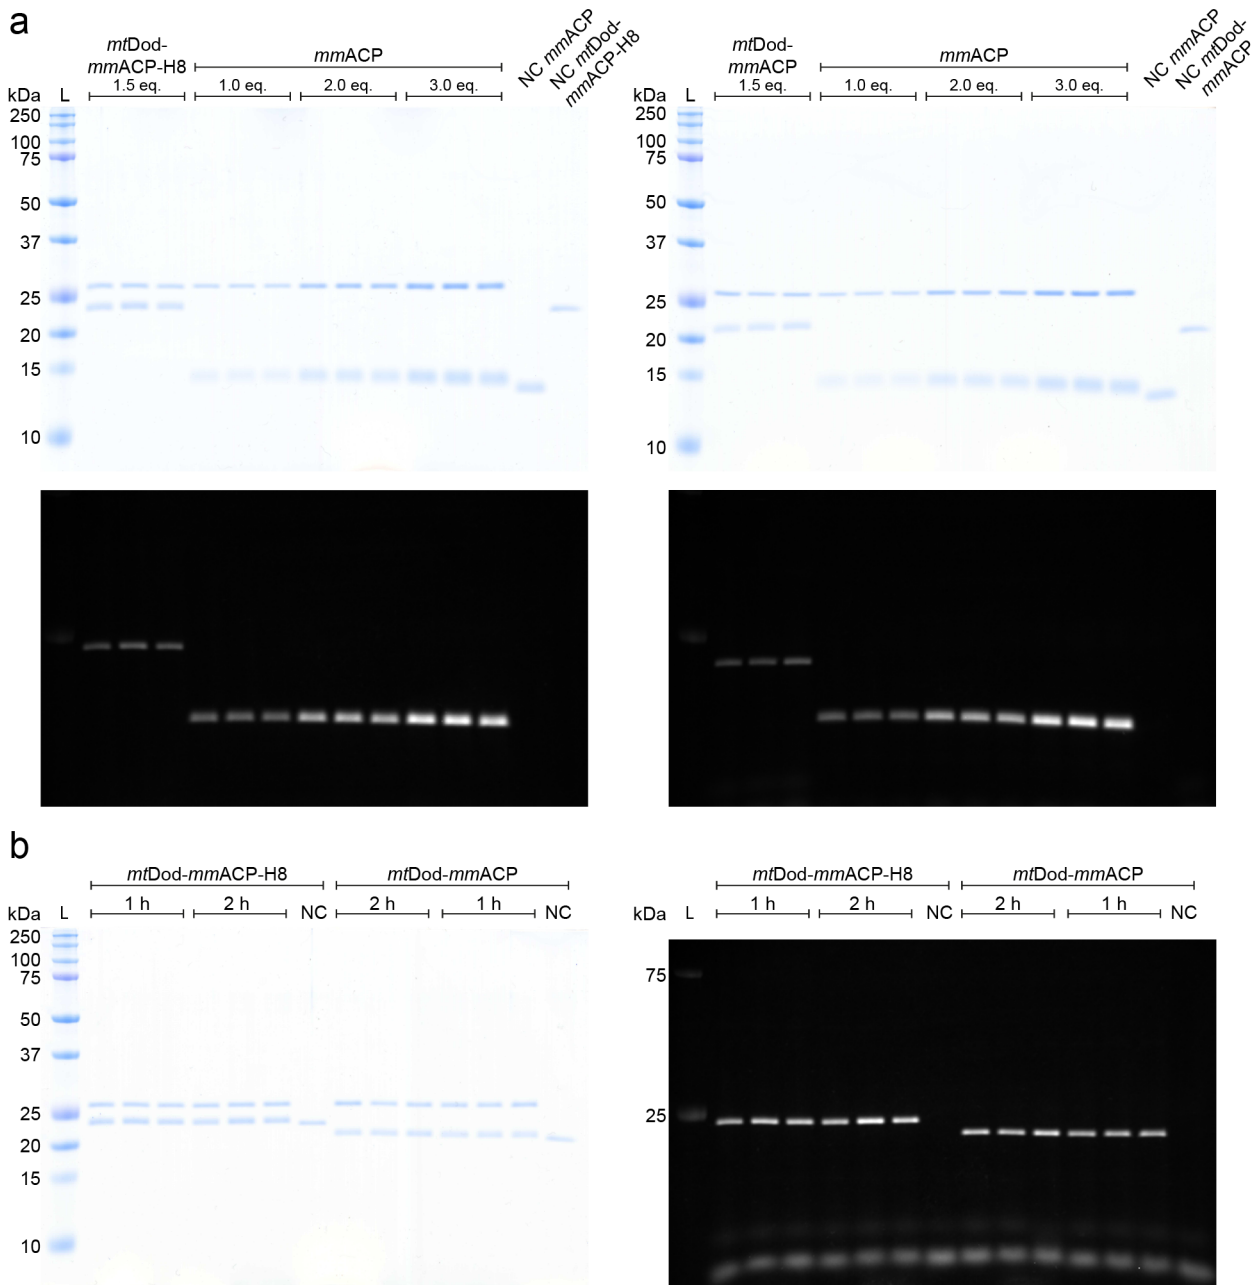

**Fig. S9:** Uncropped SDS-PAGE gels of the modification of *mtDod-mmACP* and *mtDod-mmACP-H8* by Sfp. a) Coomassie stained gels at top, fluorescence images at the bottom. b) (left panel) Coomassie stained gels, (right) fluorescence images. At the bottom of the gel, free fluorophore is observable. In a) no free fluorophore is visible, because of the shorter exposure time used for the images



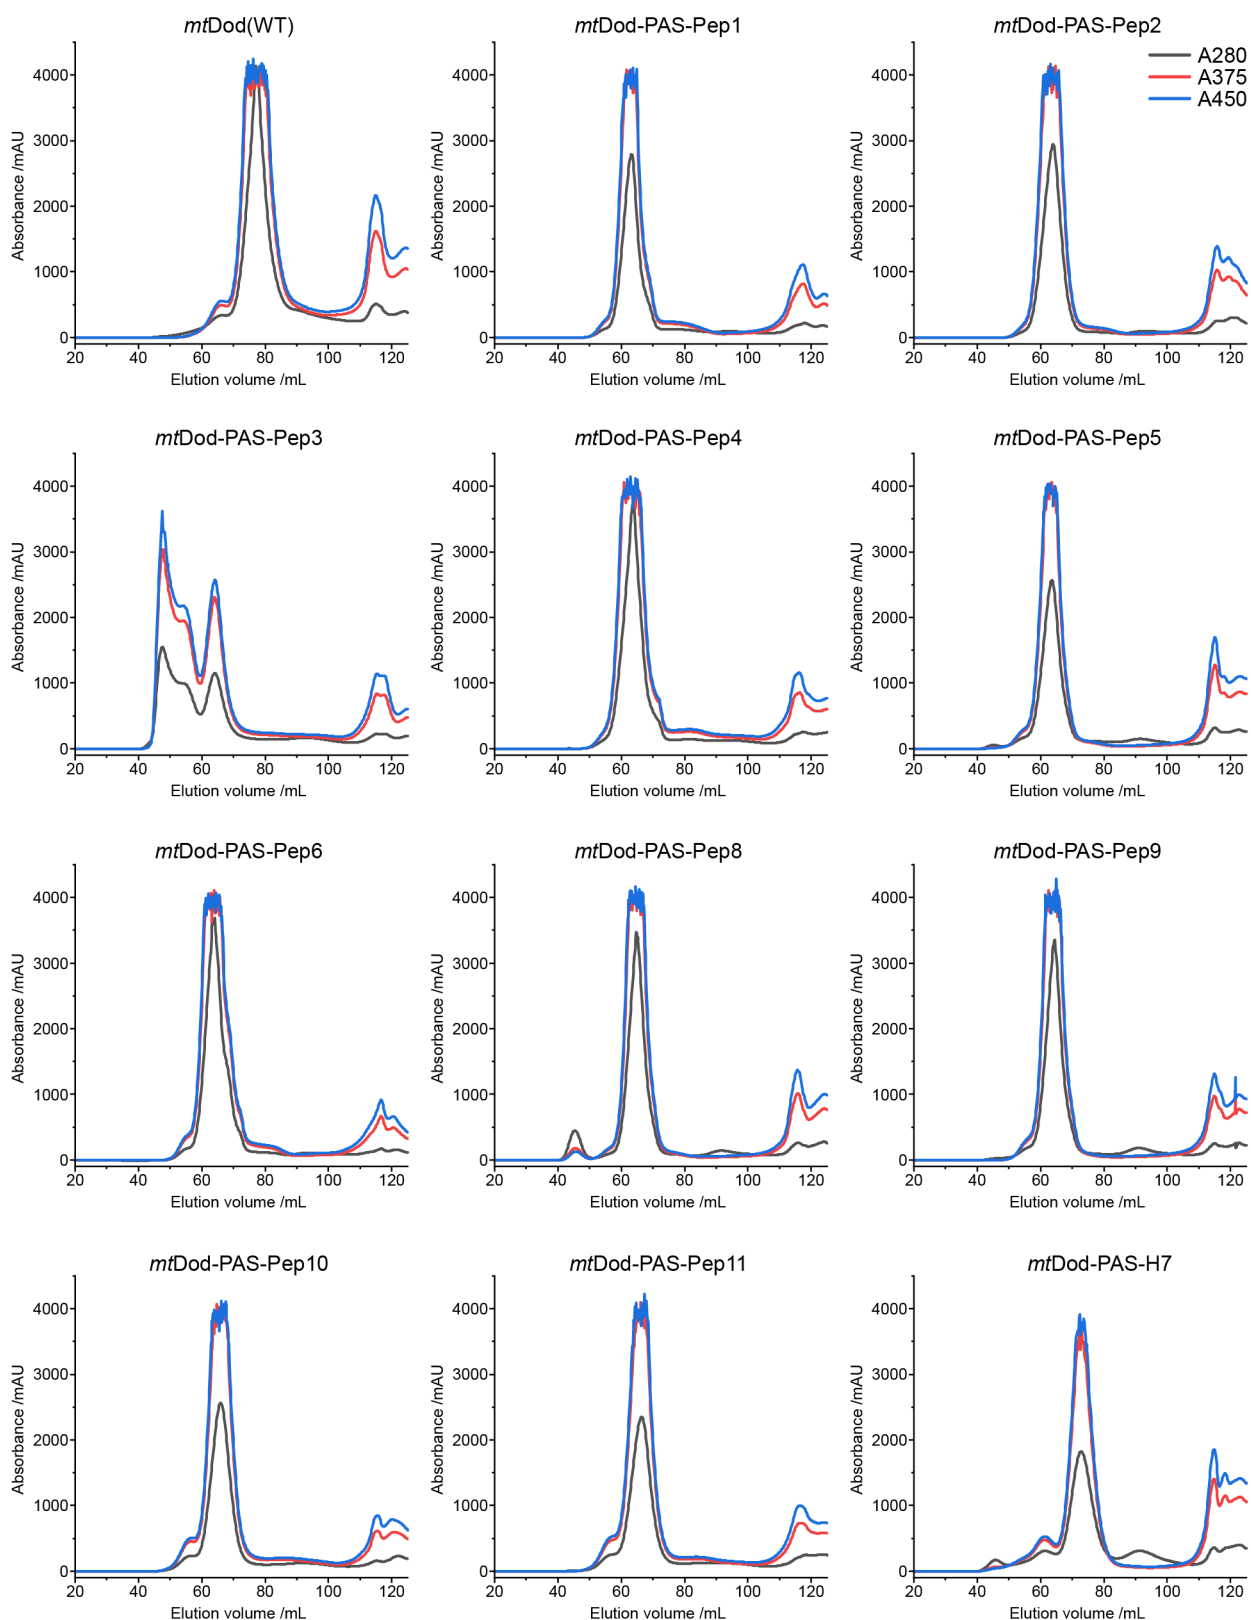

**Fig. S10:** SEC chromatograms of *mtDod*-PAS-Pep constructs, *mtDod*-PAS-H7 and *mtDod*(WT). Used column: Superdex 200 16/60 pg column. Except for *mtDod*-PAS-Pep3, only minor amounts of aggregates are visible. At about 117 mL, unbound FMN is eluting.



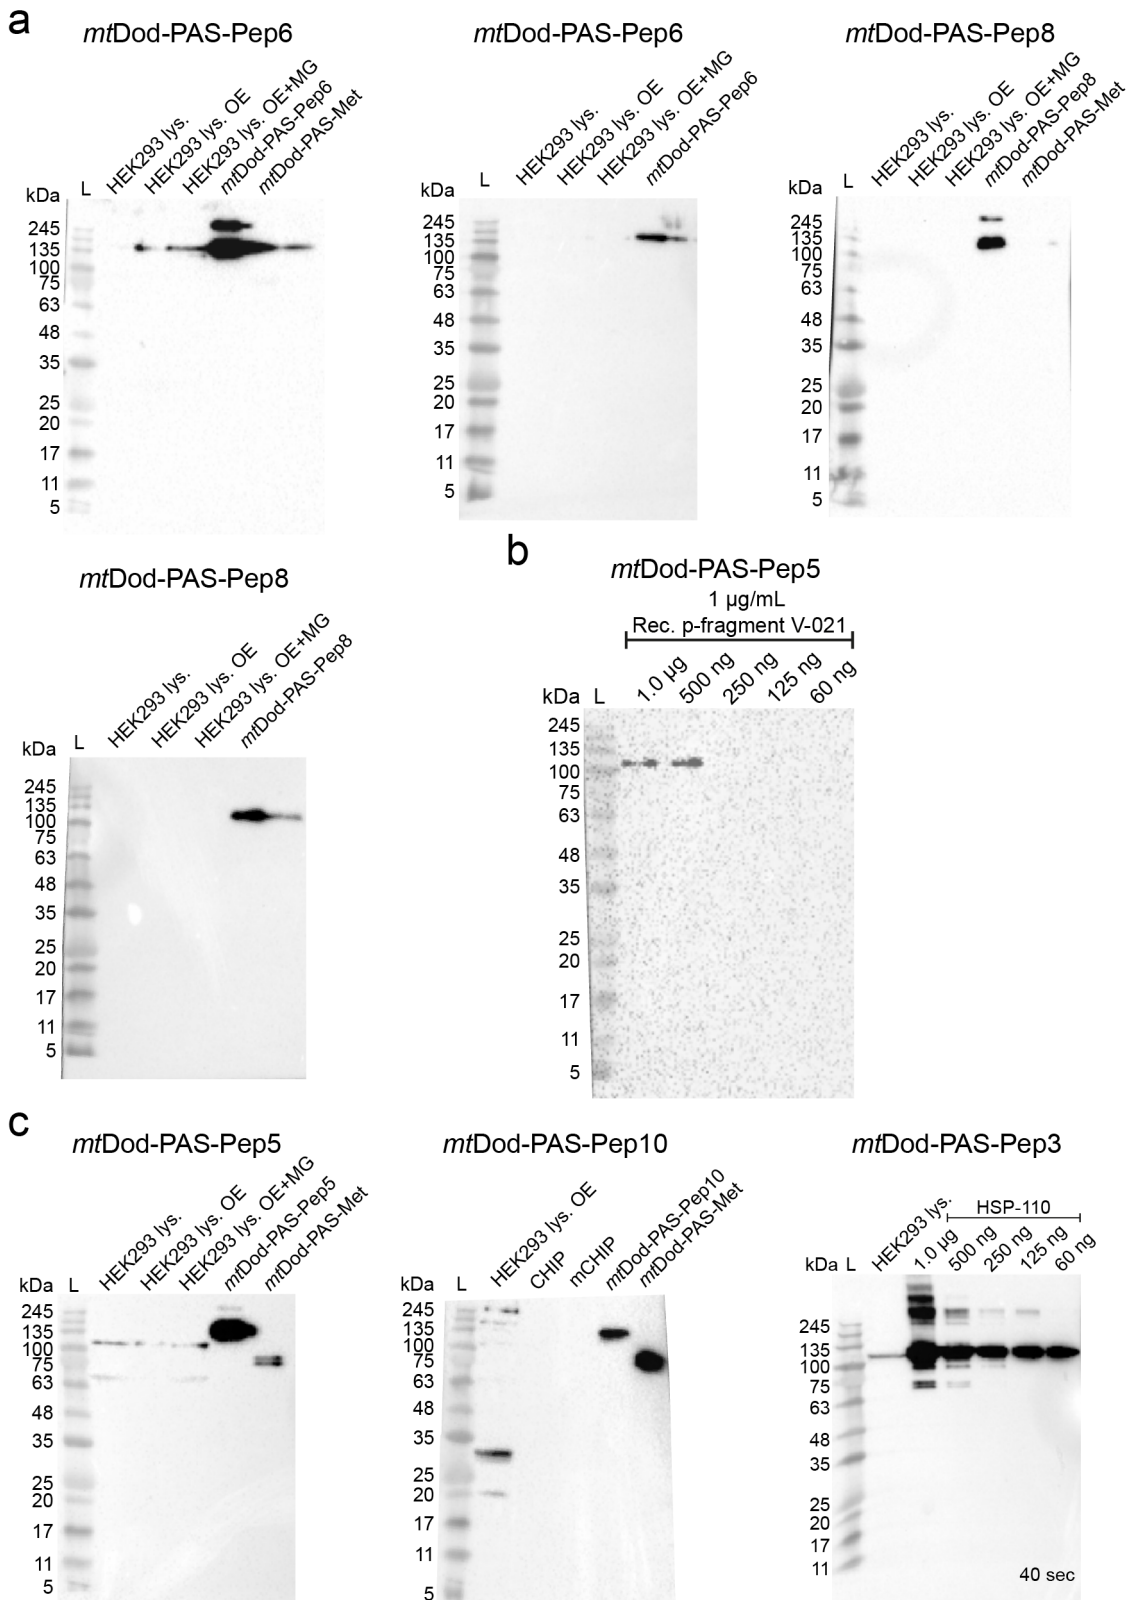

**Fig. S11:** Additional western blots for class assignment. L: Ladder. Lys.: Lysate. OE: protein overexpressing cells. MG: proteasome inhibitor MG-132 added. mCHIP: fragment of CHIP. a) Western blots of “class 3”ABs. Both ABs seem not to recognize *mtDod-PAS-Met* (band expected at about 75 kDa) b) Western blot with ABs derived from *mtDod-PAS-Pep5*. Bands were observed after an exposure time of about 300 sec. c) Uncropped western blots of Fig. 8 a.

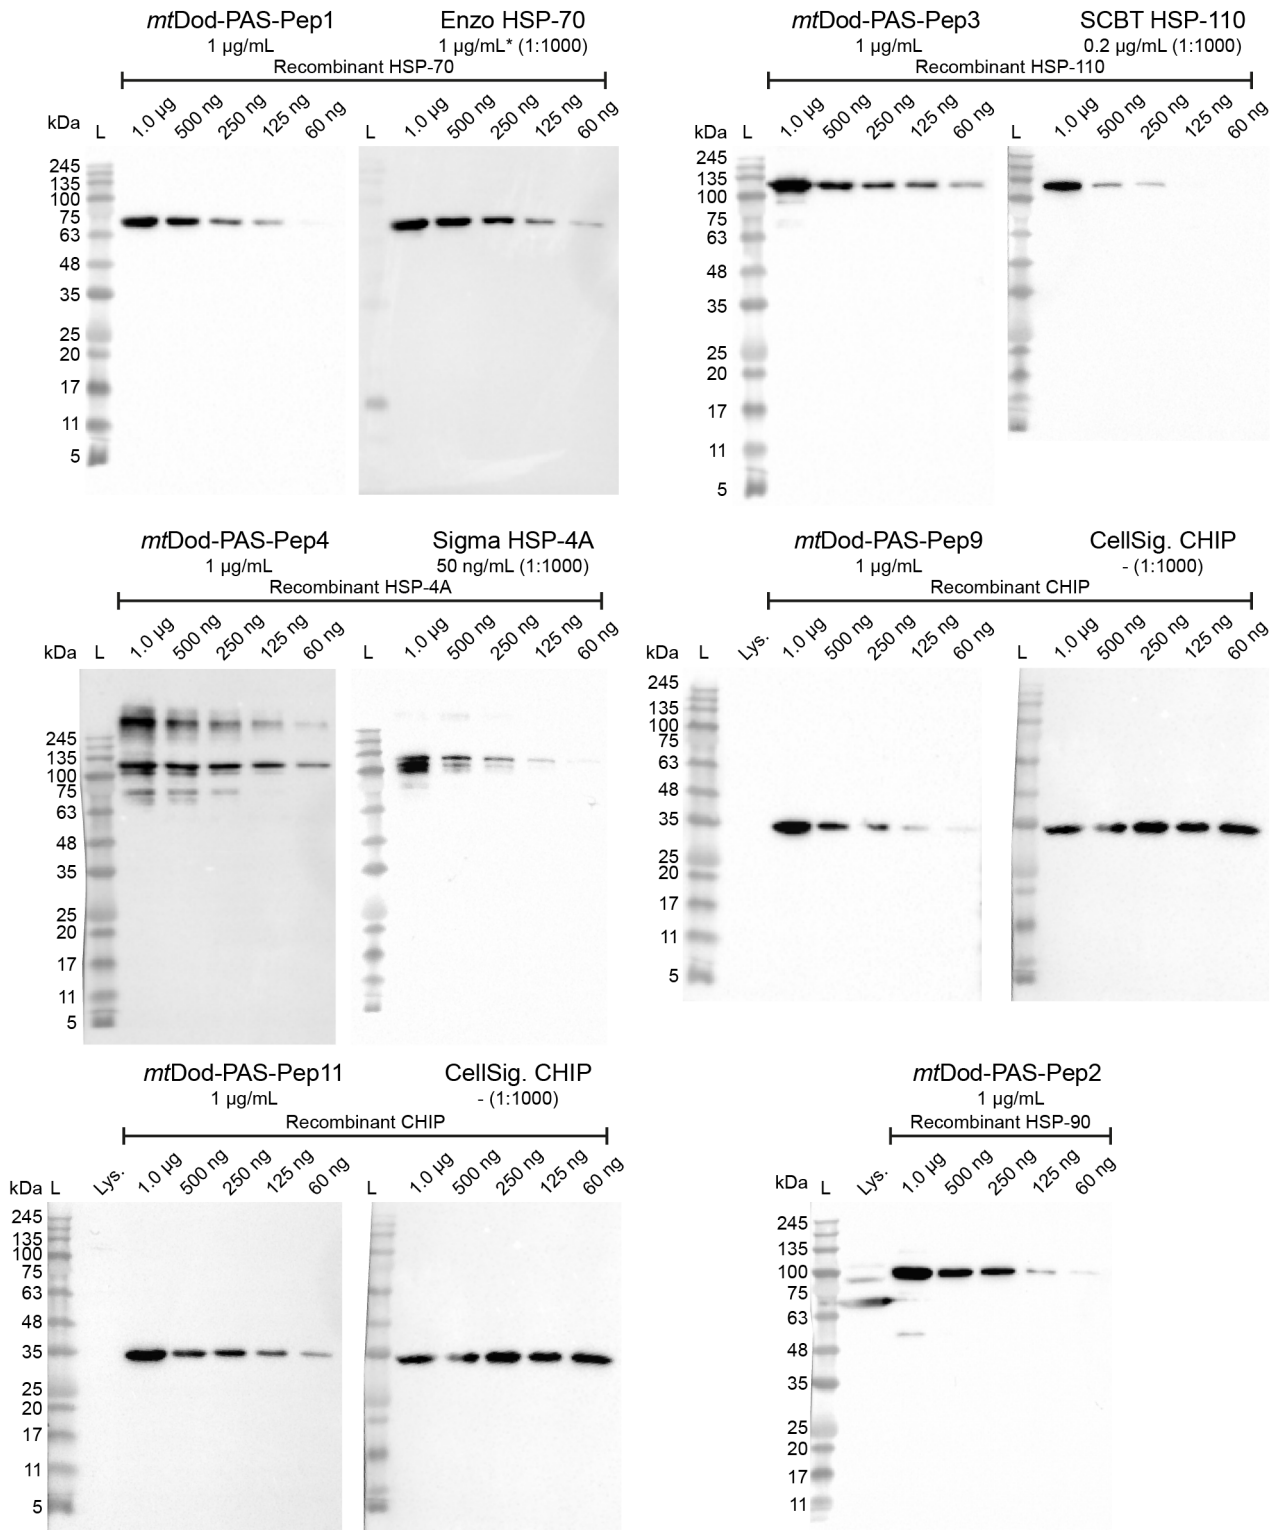

**Fig. S12:** Uncropped western blots of Fig 8 b. L: Ladder. Lys.: Lysate.

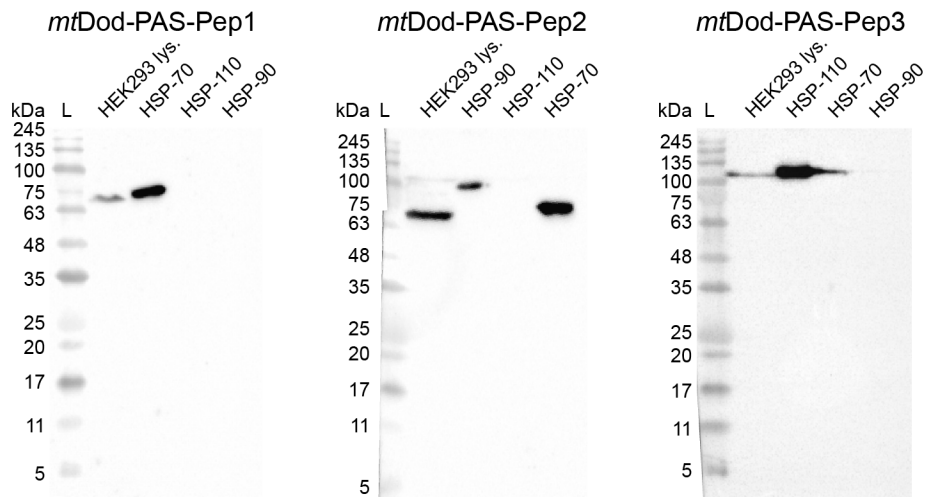

**Fig. S13:** Western blots of HSP recognizing ABs in comparison. L: Ladder. ABs derived from *mtDod-PAS-Pep2* (designed for HSP-90) recognizes also HSP-70. AB derived from *mtDod-PAS-Pep1* and *mtDod-PAS-Pep3* recognize only the protein of interest (HSP-90 and HSP-110, respectively).

**Table S1:** Table of encoding sequences for all constructs used in this study, except recombinant proteins used in western blotting. All plasmids used for expression were based on a pET22b vector backbone (*lacI* coding sequence, ampicillin resistance, pBR322 origin and fl origin). Sequences encoding mClover3, mRuby3, SpyC and SnpC were cloned from vectors obtained from Addgene (Plasmid: #74252, pKanCMV-mClover3-mRuby3<sup>2</sup>; Plasmid: #72324, pET28a SpyCatcher-SnoopCatcher<sup>3</sup>). For the polycistronic constructs, spacer DNA sequences between stop codon of the previous gene and the +42 upstream bases of the next gene (based on the pET22b vector and an added restriction side) were designed with EGNAS (version 1158, to minimize secondary structures).<sup>4</sup> These spacer regions were used for cloning (annealing area for In-Fusion HD Cloning (TaKaRa Bio Europe)). Amino acid sequences of linkers and restriction sites are highlighted in yellow.

| Construct               | DNA sequence<br>T7 promotor to T7 terminator<br>(CDS uppercase)                                                                                                                                                                                                                                                                                                                                                                                                                                                                                                                                                                                                                | Amino acid sequence<br>(linker)                                                                                                     |
|-------------------------|--------------------------------------------------------------------------------------------------------------------------------------------------------------------------------------------------------------------------------------------------------------------------------------------------------------------------------------------------------------------------------------------------------------------------------------------------------------------------------------------------------------------------------------------------------------------------------------------------------------------------------------------------------------------------------|-------------------------------------------------------------------------------------------------------------------------------------|
| <i>mtDod-peptides</i>   |                                                                                                                                                                                                                                                                                                                                                                                                                                                                                                                                                                                                                                                                                |                                                                                                                                     |
| <i>mtDod</i> (WT)       | cccgcaaaataacgactcaactataggggaattgtgagcggataacaattcccctcagaataattttgtaactttaagaag<br>gagatatacatATGAGCAATCACACCTACCGAGTGATCGAGATCGTCGGGACCTCGCCCGA<br>CGGCGTCGACGCGGCAATCCAGGGCGGTCTGGCCGAGCTGCGCAGACCATGCGCG<br>CGCTGGACTGGTTCGAAGTACAGTCAATTTCGAGGCCACCTGGTTCGACGGAGCGGTCCG<br>CGCACTCCAGGTGACTATGAAAGTCCGGCTCCCGCTGGAGGATTCCCTCGAGGGGG<br>ccaccaccaccctgagatccggctgctaacaagccgcaaggaagctgagttggctgctccaccgctgagcaataacta<br>gataaacccctggggcctctaaacgggtcttgaggggtttttg                                                                                                                                                                                                     | MSNHTRYVIEIVGTS PDGVDAAIQGGLA<br>RAAQTMRALDWFVEVQSIRGHLVDGAVA<br>HFQVTMKVGFRLDS*                                                    |
| <i>mtDod</i> -GSG-Lys   | cccgcaaaataacgactcaactataggggaattgtgagcggataacaattcccctcagaataattttgtaactttaagaag<br>gagatatacatATGAGCAATCACACCTACCGAGTGATCGAGATCGTCGGGACCTCGCCCGA<br>CGGCGTCGACGCGGCAATCCAGGGCGGTCTGGCCGAGCTGCGCAGACCATGCGCG<br>CGCTGGACTGGTTCGAAGTACAGTCAATTTCGAGGCCACCTGGTTCGACGGAGCGGTCCG<br>CGCACTCCAGGTGACTATGAAAGTCCGGCTCCCGCTGGAGGATTCCCTCGAGGGGG<br>GTGGCGCAGTGGTGGCGGCGTAAATGAGGTGACTCTCTGCTTGGCTGCTGCGTC<br>TGCTGAACTgagatccggctgctaacaagccgcaaggaagctgagttggctgctccaccgctgagcaataactagc<br>ataaacccctggggcctctaaacgggtcttgaggggtttttg                                                                                                                                              | MSNHTRYVIEIVGTS PDGVDAAIQGGLA<br>RAAQTMRALDWFVEVQSIRGHLVDGAVA<br>HFQVTMKVGFRLDSLEGGGGSGGGG<br>K*                                    |
| <i>mtDod</i> -PAS-Met   | cccgcaaaataacgactcaactataggggaattgtgagcggataacaattcccctcagaataattttgtaactttaagaag<br>gagatatacatATGAGCAATCACACCTACCGAGTGATCGAGATCGTCGGGACCTCGCCCGA<br>CGGCGTCGACGCGGCAATCCAGGGCGGTCTGGCCGAGCTGCGCAGACCATGCGCG<br>CGCTGGACTGGTTCGAAGTACAGTCAATTTCGAGGCCACCTGGTTCGACGGAGCGGTCCG<br>CGCACTCCAGGTGACTATGAAAGTCCGGCTCCCGCTGGAGGATTCCCTCGAGTCTCC<br>AGTTCGCGCTGCTCCGGCAAGCCCTGCGAGCATGTGAggatccaccaccaccaccaccctgag<br>atccggctgctaacaagccgcaaggaagctgagttggctgctccaccgctgagcaataactagcataaacccctggggcc<br>tctaaacgggtcttgaggggtttttg                                                                                                                                                | MSNHTRYVIEIVGTS PDGVDAAIQGGLA<br>RAAQTMRALDWFVEVQSIRGHLVDGAVA<br>HFQVTMKVGFRLDSLESPAAPAPASPA<br>SM*                                 |
| <i>mtDod</i> -SpyT      | cccgcaaaataacgactcaactataggggaattgtgagcggataacaattcccctcagaataattttgtaactttaagaag<br>gagatatacatATGAGCAATCACACCTACCGAGTGATCGAGATCGTCGGGACCTCGCCCGA<br>CGGCGTCGACGCGGCAATCCAGGGCGGTCTGGCCGAGCTGCGCAGACCATGCGCG<br>CGCTGGACTGGTTCGAAGTACAGTCAATTTCGAGGCCACCTGGTTCGACGGAGCGGTCCG<br>CGCACTCCAGGTGACTATGAAAGTCCGGCTCCCGCTGGAGGATTCCCTCGAGTCTCC<br>AGTTCGCGCTGCTCCGGCAAGCCCTGCGAGCGGTGGAGCGGTGCACATATCGTCAT<br>GGTTGATGCGTACAAACCGACCAATGAggatccaccaccaccaccaccctgagatccggctgcta<br>aaagccgcaaggaagctgagttggctgctccaccgctgagcaataactagcataaacccctggggcctctaaacgggtctt<br>gaggggtttttg                                                                                               | MSNHTRYVIEIVGTS PDGVDAAIQGGLA<br>RAAQTMRALDWFVEVQSIRGHLVDGAVA<br>HFQVTMKVGFRLDSLESPAAPAPASPA<br>SGSGAHIVMVDAYKPTK*                  |
| SpyT- <i>mtDod</i>      | cccgcaaaataacgactcaactataggggaattgtgagcggataacaattcccctcagaataattttgtaactttaagaag<br>gagatatacatATGGCACATATCGTCATGGTTGATGCGTACAAACCGACCAAGGTGGCAGC<br>GGTTCACAGCTGCGCTGCTCCGGCAAGCCCTGCGAGCAGCAATCACACCTACCGA<br>GTGATCGAGATCGTCGGGACCTCGCCCGACGGCTGCGACGCGGCAATCCAGGGCGG<br>TCTGGCCGAGCTGCGCAGACCATGCGCGCGCTGGACTGGTTCGAAGTACAGTCAAT<br>TCGAGGCCACCTGGTTCGACGGAGCGGTCCGGCACTTCAGGTGACTATGAAAGTCCG<br>CTTCGGCTGGAGGATTCTGActgagcaccaccaccaccaccctgagatccggctgctaacaagccg<br>aaaggaagctgagttggctgctccaccgctgagcaataactagcataaacccctggggcctctaaacgggtcttgaggggtttt<br>tg                                                                                                         | MAHIVMVDAYKPTKGGSGSPAAPAPAS<br>PAS*SNHTRYVIEIVGTS PDGVDAAIQGGLA<br>RAAQTMRALDWFVEVQSIRGHLVDGAV<br>AHFQVTMKVGFRLDS*                  |
| <i>mtDod</i> -PAS2-SpyT | cccgcaaaataacgactcaactataggggaattgtgagcggataacaattcccctcagaataattttgtaactttaagaag<br>gagatatacatATGAGCAATCACACCTACCGAGTGATCGAGATCGTCGGGACCTCGCCCGA<br>CGGCGTCGACGCGGCAATCCAGGGCGGTCTGGCCGAGCTGCGCAGACCATGCGCG<br>CGCTGGACTGGTTCGAAGTACAGTCAATTTCGAGGCCACCTGGTTCGACGGAGCGGTCCG<br>CGCACTCCAGGTGACTATGAAAGTCCGGCTCCCGCTGGAGGATTCCCTCGAGTCTCC<br>AGTTCGCGCTGCTCCGGCAAGCCCTGCGTCTCCGGCACCCTGCTGCGCCAGCTGCATC<br>TCCAGCAGCGGGTGGCAGCGGTGCACATATCGTCATGGTTGATGCGTACAAACCGAC<br>CAAATGAggatccaccaccaccaccaccctgagatccggctgctaacaagccgcaaggaagctgagttggctgct<br>gccaccgctgagcaataactagcataaacccctggggcctctaaacgggtcttgaggggtttttg                                                      | MSNHTRYVIEIVGTS PDGVDAAIQGGLA<br>RAAQTMRALDWFVEVQSIRGHLVDGAVA<br>HFQVTMKVGFRLDSLESPAAPAPASPA<br>SPAPSAPAASPAAGSGS*AHIVMVDAYK<br>TK* |
| SpyT-PAS2- <i>mtDod</i> | cccgcaaaataacgactcaactataggggaattgtgagcggataacaattcccctcagaataattttgtaactttaagaag<br>gagatatacatATGGCACATATCGTCATGGTTGATGCGTACAAACCGACCAAGGTGGCAGC<br>GGTTCACAGCTGCGCTGCTCCGGCAAGCCCTGCGTCTCCGGCACCCTGTCGGCA<br>CGCTGCATCTCCAGCAGCGAGCAATCACACCTACCGAGTGATCGAGATCGTCGGGACCT<br>GCGCCGACGGCTCGACGCGGCAATCCAGGGCGGTCTGGCCGAGCTGCGCAGACCATGCGCG<br>CGCACTCCAGGTGACTATGAAAGTCCGGCTCCCGCTGGAGGATTCCCTCGAGTCTCC<br>ATGCGCGCGCTGGACTGGTTCGAAGTACAGTCAATTTCGAGGCCACCTGGTTCGACGGA<br>CGGCTCGCGCACTTCAGGTGACTATGAAAGTCCGGCTCCCGCTGGAGGATTCCCTGAG<br>ctgagcaccaccaccaccctgagatccggctgctaacaagccgcaaggaagctgagttggctgctccaccgctg<br>gcaataactagcataaacccctggggcctctaaacgggtcttgaggggtttttg | MAHIVMVDAYKPTKGGSGSPAAPAPAS<br>PASPAPSAPAASPA*SNHTRYVIEIVGTS<br>PDGVDAAIQGLARAAQTMRALDWFVEV<br>QSIRGHLVDGAVAHFQVTMKVGFRLD<br>S*     |

|                                               |                                                                                                                                                                                                                                                                                                                                                                                                                                                                                                                                                                                                                                                                             |                                                                                                                                                               |
|-----------------------------------------------|-----------------------------------------------------------------------------------------------------------------------------------------------------------------------------------------------------------------------------------------------------------------------------------------------------------------------------------------------------------------------------------------------------------------------------------------------------------------------------------------------------------------------------------------------------------------------------------------------------------------------------------------------------------------------------|---------------------------------------------------------------------------------------------------------------------------------------------------------------|
| <p>SpyT-<i>mtDod</i>-<i>Snpt</i></p>          | <p>cccgcaaaataacgactcaactataggggaattgtgagcggataaacaattcccctcagaataattttgtaactttaagaag<br/>gagatacatATGGCACATATGTCATGTTGATGCGTACAAACCCGCAAGGTTGGCAGC<br/>GGTCTCCAGCTGCGCCTGCTCCGGCAAGCCCTGCGAGCAGCAATCACACCTACCGA<br/>GTGATCGAGATCGTGGGACCTCGCCCGACGGCGTGCAGCGGCAATCCAGGGCGG<br/>TCTGGCCGAGCTGCGCAGACCATGCGCGCGTGGACTGGTTCGAAAGTACAGTCAAT<br/>TCGAGGCCACCTGGTTCGAGCGAGCGGTGCGCGCCTCCAGGTTGACTATGAAAGTCCG<br/>CTCCGCTGAGGAACTCCTCCAGCTGCGCCTGCTCCGCAAGCCCTGCGAGCGG<br/>TGGAGCGGTGCAAACTGGGCGATATTGAATTTATTAAGTGAACAAGGCTATTGag<br/>gatccccaccaccaccactgagatccggctgtaacaagcccgaaaggaagctgagttgctgctgcccaccgctga<br/>gcaataactagcaataaccctggggccttaaacgggcttgagggtttttt</p>     | <p>MAHIVMVDAYKPTGGSGSPAAPAPAS<br/>PASNSNHYRVEIVGTS PDGVDAIQGGL<br/>ARAAQTMRALDWFVQSIRGHLVDGAV<br/>AHFQVTMKVGFRLSDSPAAPAPASPA<br/>SGSGGKGLDIEFIKVNKGY*</p>     |
| <p><i>Snpt</i>-<i>mtDod</i>-<i>SpyT</i></p>   | <p>cccgcaaaataacgactcaactataggggaattgtgagcggataaacaattcccctcagaataattttgtaactttaagaag<br/>gagatacatATGGGCAACTGGCGATATTGAATTTATTAAGTGAACAAGGCTATGTT<br/>GGCAGCGGTTCTCCAGCTGCGCCTGCTCCGGCAAGCCCTGCGAGCAGCAATCACACC<br/>TACCGAGTGATCGAGATCGTGGGACCTCGCCCGACGGCGTGCAGCGGCAATCCAG<br/>GGCGTCTGGCCGAGCTGCGCAGACCATGCGCGCGTGGACTGGTTCGAAAGTACAG<br/>TCAATTCGAGGCCACCTGGTGCAGCGAGCGGTGCGCGCCTCCAGGTTGACTATGAAA<br/>GCTCGCTCCGCTGGAGGATTCCTCCAGTCTCCAGCTGCGCCTGCTCCGCAAGC<br/>CCTGCGAGCGGTGCGAGCGTGCACATATGTCATGTTGATGCGTACAAACCGACC<br/>AAATGAgatccccaccaccaccactgagatccggctgtaacaagcccgaaaggaagctgagttgctgctg<br/>ccaccgctgagcaataactagcaataaccctggggccttaaacgggcttgagggtttttt</p> | <p>MKGLDIEFIKVNKGYGGSGSPAAPAPA<br/>SPASNSNHYRVEIVGTS PDGVDAIQGGL<br/>LARAQTMRALDWFVQSIRGHLVDGAV<br/>VAHFQVTMKVGFRLSDSPAAPAPASPA<br/>PASGGSGAHIVMVDAYKPTK*</p> |
| <p><i>mtDod</i>-<i>PAS</i>-<i>StreplI</i></p> | <p>cccgcaaaataacgactcaactataggggaattgtgagcggataaacaattcccctcagaataattttgtaactttaagaag<br/>gagatacatATGAGCAATCACACCTACCGAGTGATCGAGATCGTGGGACCTCGCCCGA<br/>GGCGTGCAGCGGCAATCCAGGGCGGTCTGGCCGAGCTGCGCAGACCATGCGCG<br/>CGTGGACTGGTTCGAAAGTACAGTCAATTCGAGGCCACCTGGTGCAGCGAGCGGTCC<br/>CGCACTCCAGGTGACTATGAAAGTCCGCTCCGCTGGAGGATTCCTCCAGTCTCC<br/>AGCTGCGCTGCTCCGGCAAGCCCTGCGAGCTGGAGCCACCCGAGTTCGAAAAATG<br/>Agatccggctgtaacaagcccgaaaggaagctgagttgctgctgcccaccgctgagcaataactagcaataaccctggg<br/>gccttaaacgggcttgagggtttttt</p>                                                                                                                                                  | <p>MSNHYRVEIVGTS PDGVDAIQGGLA<br/>RAAQTMRALDWFVQSIRGHLVDGAVA<br/>HFQVTMKVGFRLSDSPAAPAPASPA<br/>SWSHPQFEK*</p>                                                 |
| <p><i>mtDod</i>-<i>PAS</i>-<i>H7</i></p>      | <p>cccgcaaaataacgactcaactataggggaattgtgagcggataaacaattcccctcagaataattttgtaactttaagaag<br/>gagatacatATGAGCAATCACACCTACCGAGTGATCGAGATCGTGGGACCTCGCCCGA<br/>CGGCTGCAGCGGCAATCCAGGGCGGTCTGGCCGAGCTGCGCAGACCATGCGCG<br/>CGCTGGACTGGTTCGAAAGTACAGTCAATTCGAGGCCACCTGGTGCAGCGAGCGGTCC<br/>CGCACTCCAGGTGACTATGAAAGTCCGCTCCGCTGGAGGATTCCTCCAGTCTCC<br/>AGCTGCGCTGCTCCGGCAAGCCCTGCGAGCCACCCACCCACCCACCCACTGAgat<br/>ccgctgcttaacaagcccgaaaggaagctgagttgctgctgcccaccgctgagcaataactagcaataaccctggggcct<br/>taaacgggcttgagggtttttt</p>                                                                                                                                                    | <p>MSNHYRVEIVGTS PDGVDAIQGGLA<br/>RAAQTMRALDWFVQSIRGHLVDGAVA<br/>HFQVTMKVGFRLSDSPAAPAPASPA<br/>SHHHHHH*</p>                                                   |
| <p><i>mtDod</i>-<i>PAS</i>-<i>Pep1</i></p>    | <p>cccgcaaaataacgactcaactataggggaattgtgagcggataaacaattcccctcagaataattttgtaactttaagaag<br/>gagatacatATGAGCAATCACACCTACCGAGTGATCGAGATCGTGGGACCTCGCCCGA<br/>CGGCTGCAGCGGCAATCCAGGGCGGTCTGGCCGAGCTGCGCAGACCATGCGCG<br/>CGCTGGACTGGTTCGAAAGTACAGTCAATTCGAGGCCACCTGGTGCAGCGAGCGGTCC<br/>CGCACTCCAGGTGACTATGAAAGTCCGCTCCGCTGGAGGATTCCTCCAGTCTCC<br/>AGCTGCGCTGCTCCGGCAAGCCCTGCGAGCCACCCACCCACCCACCCACTGAgat<br/>ccgctgcttaacaagcccgaaaggaagctgagttgctgctgcccaccgctgagcaataactagcaataaccctggggcct<br/>taaacgggcttgagggtttttt</p>                                                                                                                                                    | <p>MSNHYRVEIVGTS PDGVDAIQGGLA<br/>RAAQTMRALDWFVQSIRGHLVDGAVA<br/>HFQVTMKVGFRLSDSPAAPAPASPA<br/>SPKGGSGSGPTIEVD*</p>                                           |
| <p><i>mtDod</i>-<i>PAS</i>-<i>Pep2</i></p>    | <p>cccgcaaaataacgactcaactataggggaattgtgagcggataaacaattcccctcagaataattttgtaactttaagaag<br/>gagatacatATGAGCAATCACACCTACCGAGTGATCGAGATCGTGGGACCTCGCCCGA<br/>CGGCTGCAGCGGCAATCCAGGGCGGTCTGGCCGAGCTGCGCAGACCATGCGCG<br/>CGCTGGACTGGTTCGAAAGTACAGTCAATTCGAGGCCACCTGGTGCAGCGAGCGGTCC<br/>CGCACTCCAGGTGACTATGAAAGTCCGCTCCGCTGGAGGATTCCTCCAGTCTCC<br/>AGCTGCGCTGCTCCGGCAAGCCCTGCGAGCCCGCTGGAAGCGGATGACGATACCG<br/>CCGATGGAAGAAGTGGATTGAgatccggctgtaacaagcccgaaaggaagctgagttgctgctgcccacc<br/>gctgagcaataactagcaataaccctggggccttaaacgggcttgagggtttttt</p>                                                                                                                             | <p>MSNHYRVEIVGTS PDGVDAIQGGLA<br/>RAAQTMRALDWFVQSIRGHLVDGAVA<br/>HFQVTMKVGFRLSDSPAAPAPASPA<br/>SPLEGGDDTSRMEVD*</p>                                           |
| <p><i>mtDod</i>-<i>PAS</i>-<i>Pep3</i></p>    | <p>cccgcaaaataacgactcaactataggggaattgtgagcggataaacaattcccctcagaataattttgtaactttaagaag<br/>gagatacatATGAGCAATCACACCTACCGAGTGATCGAGATCGTGGGACCTCGCCCGA<br/>CGGCTGCAGCGGCAATCCAGGGCGGTCTGGCCGAGCTGCGCAGACCATGCGCG<br/>CGCTGGACTGGTTCGAAAGTACAGTCAATTCGAGGCCACCTGGTGCAGCGAGCGGTCC<br/>CGCACTCCAGGTGACTATGAAAGTCCGCTCCGCTGGAGGATTCCTCCAGTCTCC<br/>AGCTGCGCTGCTCCGGCAAGCCCTGCGAGCCCGCTGGAAGCGGATGACGATACCG<br/>CGTGAACATGATCGATTGAgatccggctgtaacaagcccgaaaggaagctgagttgctgctgcccacc<br/>gctgagcaataactagcaataaccctggggccttaaacgggcttgagggtttttt</p>                                                                                                                               | <p>MSNHYRVEIVGTS PDGVDAIQGGLA<br/>RAAQTMRALDWFVQSIRGHLVDGAVA<br/>HFQVTMKVGFRLSDSPAAPAPASPA<br/>SECPYNEKNVNMMLD*</p>                                           |
| <p><i>mtDod</i>-<i>PAS</i>-<i>Pep4</i></p>    | <p>cccgcaaaataacgactcaactataggggaattgtgagcggataaacaattcccctcagaataattttgtaactttaagaag<br/>gagatacatATGAGCAATCACACCTACCGAGTGATCGAGATCGTGGGACCTCGCCCGA<br/>CGGCTGCAGCGGCAATCCAGGGCGGTCTGGCCGAGCTGCGCAGACCATGCGCG<br/>CGCTGGACTGGTTCGAAAGTACAGTCAATTCGAGGCCACCTGGTGCAGCGAGCGGTCC<br/>CGCACTCCAGGTGACTATGAAAGTCCGCTCCGCTGGAGGATTCCTCCAGTCTCC<br/>AGCTGCGCTGCTCCGGCAAGCCCTGCGAGCGTGCAGCGACGCGATAAAGAACT<br/>GCCGAAATGATATTGATTGAgatccggctgtaacaagcccgaaaggaagctgagttgctgctgcccacc<br/>gctgagcaataactagcaataaccctggggccttaaacgggcttgagggtttttt</p>                                                                                                                                | <p>MSNHYRVEIVGTS PDGVDAIQGGLA<br/>RAAQTMRALDWFVQSIRGHLVDGAVA<br/>HFQVTMKVGFRLSDSPAAPAPASPA<br/>SVPSDDKKLPEMID*</p>                                            |
| <p><i>mtDod</i>-<i>PAS</i>-<i>Pep5</i></p>    | <p>cccgcaaaataacgactcaactataggggaattgtgagcggataaacaattcccctcagaataattttgtaactttaagaag<br/>gagatacatATGAGCAATCACACCTACCGAGTGATCGAGATCGTGGGACCTCGCCCGA<br/>CGGCTGCAGCGGCAATCCAGGGCGGTCTGGCCGAGCTGCGCAGACCATGCGCG<br/>CGCTGGACTGGTTCGAAAGTACAGTCAATTCGAGGCCACCTGGTGCAGCGAGCGGTCC<br/>CGCACTCCAGGTGACTATGAAAGTCCGCTCCGCTGGAGGATTCCTCCAGTCTCC<br/>AGCTGCGCTGCTCCGGCAAGCCCTGCGAGCGATAGCAGCCAGCATACCAAGAGCTC<br/>TGCGAAATGGAAGTGGATTGAgatccggctgtaacaagcccgaaaggaagctgagttgctgctgcccacc<br/>gctgagcaataactagcaataaccctggggccttaaacgggcttgagggtttttt</p>                                                                                                                            | <p>MSNHYRVEIVGTS PDGVDAIQGGLA<br/>RAAQTMRALDWFVQSIRGHLVDGAVA<br/>HFQVTMKVGFRLSDSPAAPAPASPA<br/>SDSSQHTKSSGEMVD*</p>                                           |
| <p><i>mtDod</i>-<i>PAS</i>-<i>Pep6</i></p>    | <p>cccgcaaaataacgactcaactataggggaattgtgagcggataaacaattcccctcagaataattttgtaactttaagaag<br/>gagatacatATGAGCAATCACACCTACCGAGTGATCGAGATCGTGGGACCTCGCCCGA<br/>CGGCTGCAGCGGCAATCCAGGGCGGTCTGGCCGAGCTGCGCAGACCATGCGCG<br/>CGCTGGACTGGTTCGAAAGTACAGTCAATTCGAGGCCACCTGGTGCAGCGAGCGGTCC<br/>CGCACTCCAGGTGACTATGAAAGTCCGCTCCGCTGGAGGATTCCTCCAGTCTCC<br/>AGCTGCGCTGCTCCGGCAAGCCCTGCGAGCGAACAGAGCACCGGCCAGAAACGCC<br/>CGCTGAAGAACGATGAACTGTGAgatccggctgtaacaagcccgaaaggaagctgagttgctgctgcccacc<br/>cgctgagcaataactagcaataaccctggggccttaaacgggcttgagggtttttt</p>                                                                                                                          | <p>MSNHYRVEIVGTS PDGVDAIQGGLA<br/>RAAQTMRALDWFVQSIRGHLVDGAVA<br/>HFQVTMKVGFRLSDSPAAPAPASPA<br/>SEQSTGQKRPLKNDL*</p>                                           |
| <p><i>mtDod</i>-<i>PAS</i>-<i>Pep7</i></p>    | <p>cccgcaaaataacgactcaactataggggaattgtgagcggataaacaattcccctcagaataattttgtaactttaagaag<br/>gagatacatATGAGCAATCACACCTACCGAGTGATCGAGATCGTGGGACCTCGCCCGA<br/>GGCGTGCAGCGGCAATCCAGGGCGGTCTGGCCGAGCTGCGCAGACCATGCGCG<br/>CGCTGGACTGGTTCGAAAGTACAGTCAATTCGAGGCCACCTGGTGCAGCGAGCGGTCC<br/>CGCACTCCAGGTGACTATGAAAGTCCGCTCCGCTGGAGGATTCCTCCAGTCTCC<br/>AGCTGCGCTGCTCCGGCAAGCCCTGCGAGCGCGCTGATGGTGTATCGCTGCGCGCC<br/>GCCGCGACGACCGAGTTTTGAgatccggctgtaacaagcccgaaaggaagctgagttgctgctgcccacc<br/>gctgagcaataactagcaataaccctggggccttaaacgggcttgagggtttttt</p>                                                                                                                            | <p>MSNHYRVEIVGTS PDGVDAIQGGLA<br/>RAAQTMRALDWFVQSIRGHLVDGAVA<br/>HFQVTMKVGFRLSDSPAAPAPASPA<br/>SALMYRCAPPRSSQF*</p>                                           |

|                                                                                           |                                                                                                                                                                                                                                                                                                                                                                                                                                                                                                                                                                                                                                                                                                                                                                                                                                                                                                                                                                   |                                                                                                                                                                                                                                                                                                                                                           |
|-------------------------------------------------------------------------------------------|-------------------------------------------------------------------------------------------------------------------------------------------------------------------------------------------------------------------------------------------------------------------------------------------------------------------------------------------------------------------------------------------------------------------------------------------------------------------------------------------------------------------------------------------------------------------------------------------------------------------------------------------------------------------------------------------------------------------------------------------------------------------------------------------------------------------------------------------------------------------------------------------------------------------------------------------------------------------|-----------------------------------------------------------------------------------------------------------------------------------------------------------------------------------------------------------------------------------------------------------------------------------------------------------------------------------------------------------|
| <i>mtDod-PAS-Pep8</i>                                                                     | <p>cccgcaaaataacgactcaactataggggaattgtgagcggataaacaattcccctctagaataattttgtaactttaagaag<br/> gagatatacatATGAGCAATCACACCTACCGAGTGATCGAGATCGTCGGGACCTCGCCCCGA<br/> CGCGCTCGACGCGGCAATCCAGGGCGGTCTGGCCGAGCTGCGCAGACCATGCGCGC<br/> CGCTGGACTGGTTCGAAGTACAGTCAATTTCGAGGCCACCTGGTCGACGGAGCGGTCC<br/> CGCACTCCAGGTGACTATGAAAGTCGGCTTCGGCCTGGAGGATTCCCTCGAGTCTCC<br/> AGCTGCGCCTGCTCCGGCAAGCCCTGCGAGCCTGGTGACCGGCCAAAAGCCTGGAACA<br/> GCTGCGCCGCGCCTGGCGCTGAgatccggctgctaacaagccggaaggaagctgagttgctgctgcca<br/> cgctgagcaataactagcataacccttggggccttaaacgggtcttgagggtttttg</p>                                                                                                                                                                                                                                                                                                                                                                                              | <p>MSNHTRYRVEIVGTS PDGVDAIIQGGLA<br/> RAAQTMRALDWFVEVQSIRGHLVDGAVA<br/> HFQVTMKVGFRLSDS <b>LESPAAPAPASPA</b><br/> <b>SLVTGESLEQLRRGLA*</b></p>                                                                                                                                                                                                            |
| <i>mtDod-PAS-Pep9</i>                                                                     | <p>cccgcaaaataacgactcaactataggggaattgtgagcggataaacaattcccctctagaataattttgtaactttaagaag<br/> gagatatacatATGAGCAATCACACCTACCGAGTGATCGAGATCGTCGGGACCTCGCCCCGA<br/> CGCGCTCGACGCGGCAATCCAGGGCGGTCTGGCCGAGCTGCGCAGACCATGCGCGC<br/> CGCTGGACTGGTTCGAAGTACAGTCAATTTCGAGGCCACCTGGTCGACGGAGCGGTCC<br/> CGCACTCCAGGTGACTATGAAAGTCGGCTTCGGCCTGGAGGATTCCCTCGAGTCTCC<br/> AGCTGCGCCTGCTCCGGCAAGCCCTGCGAGCATGAAAGGCAAAGAAGAGAAAGGAAAG<br/> CGCGCGCCGCGCCTGGCGCTGAgatccggctgctaacaagccggaaggaagctgagttgctgctgcca<br/> ccgctgagcaataactagcataacccttggggccttaaacgggtcttgagggtttttg</p>                                                                                                                                                                                                                                                                                                                                                                                             | <p>MSNHTRYRVEIVGTS PDGVDAIIQGGLA<br/> RAAQTMRALDWFVEVQSIRGHLVDGAVA<br/> HFQVTMKVGFRLSDS <b>LESPAAPAPASPA</b><br/> <b>SMKGKEEKEGGARLGA*</b></p>                                                                                                                                                                                                            |
| <i>mtDod-PAS-Pep10</i>                                                                    | <p>cccgcaaaataacgactcaactataggggaattgtgagcggataaacaattcccctctagaataattttgtaactttaagaag<br/> gagatatacatATGAGCAATCACACCTACCGAGTGATCGAGATCGTCGGGACCTCGCCCCGA<br/> CGCGCTCGACGCGGCAATCCAGGGCGGTCTGGCCGAGCTGCGCAGACCATGCGCGC<br/> CGCTGGACTGGTTCGAAGTACAGTCAATTTCGAGGCCACCTGGTCGACGGAGCGGTCC<br/> CGCACTCCAGGTGACTATGAAAGTCGGCTTCGGCCTGGAGGATTCCCTCGAGTCTCC<br/> AGCTGCGCCTGCTCCGGCAAGCCCTGCGAGCGAAGAACCGCCGATTATCAGGAAAG<br/> CGAATGAgatccggctgctaacaagccggaaggaagctgagttgctgctgccaaccctgagcaataactagcataa<br/> cccttggggccttaaacgggtcttgagggtttttg</p>                                                                                                                                                                                                                                                                                                                                                                                                              | <p>MSNHTRYRVEIVGTS PDGVDAIIQGGLA<br/> RAAQTMRALDWFVEVQSIRGHLVDGAVA<br/> HFQVTMKVGFRLSDS <b>LESPAAPAPASPA</b><br/> <b>SEERRIHQESE*</b></p>                                                                                                                                                                                                                 |
| <i>mtDod-PAS-Pep11</i>                                                                    | <p>cccgcaaaataacgactcaactataggggaattgtgagcggataaacaattcccctctagaataattttgtaactttaagaag<br/> gagatatacatATGAGCAATCACACCTACCGAGTGATCGAGATCGTCGGGACCTCGCCCCGA<br/> CGCGCTCGACGCGGCAATCCAGGGCGGTCTGGCCGAGCTGCGCAGACCATGCGCGC<br/> CGCTGGACTGGTTCGAAGTACAGTCAATTTCGAGGCCACCTGGTCGACGGAGCGGTCC<br/> CGCACTCCAGGTGACTATGAAAGTCGGCTTCGGCCTGGAGGATTCCCTCGAGTCTCC<br/> AGCTGCGCCTGCTCCGGCAAGCCCTGCGAGCAACCATGAAAGGCGATGAAGATGATAG<br/> CCATTGAgatccggctgctaacaagccggaaggaagctgagttgctgctgccaaccctgagcaataactagcataa<br/> cccttggggccttaaacgggtcttgagggtttttg</p>                                                                                                                                                                                                                                                                                                                                                                                                            | <p>MSNHTRYRVEIVGTS PDGVDAIIQGGLA<br/> RAAQTMRALDWFVEVQSIRGHLVDGAVA<br/> HFQVTMKVGFRLSDS <b>LESPAAPAPASPA</b><br/> <b>SNHEGEDDSDH*</b></p>                                                                                                                                                                                                                 |
| <b>poly-cistronic constructs</b>                                                          | <p><b>DNA sequence</b><br/> <b>T7 promotor to T7 terminator</b><br/> <b>(CDS uppercase, <b>spacer sequence</b>)</b></p>                                                                                                                                                                                                                                                                                                                                                                                                                                                                                                                                                                                                                                                                                                                                                                                                                                           | <p><b>Amino acid sequence</b><br/> <b>(linker)</b></p>                                                                                                                                                                                                                                                                                                    |
| <i>bici</i><br>( <i>mtDod</i> (WT);<br><i>mtDod-PAS-StreplI</i> )                         | <p>cccgcaaaataacgactcaactataggggaattgtgagcggataaacaattcccctctagaataattttgtaactttaagaag<br/> gagatatacatATGAGCAATCACACCTACCGAGTGATCGAGATCGTCGGGACCTCGCCCCGA<br/> CGCGCTCGACGCGGCAATCCAGGGCGGTCTGGCCGAGCTGCGCAGACCATGCGCGC<br/> CGCTGGACTGGTTCGAAGTACAGTCAATTTCGAGGCCACCTGGTCGACGGAGCGGTCC<br/> CGCACTCCAGGTGACTATGAAAGTCGGCTTCGGCCTGGAGGATTCCCTGAgggttgaaac<br/> <b>ttccgagga</b>gaattcaataattttgtaactttaagaagagagatatacatATGAGCAATCACACCTACCGAGTGA<br/> TCGAGATCGTCGGGACCTCGCCGACGCGCTCGACGCGCAATCCAGGGCGGTCTG<br/> GCCGAGCTGCGCAGACCATGCGCGCGCTGGACTGGTTCGAAGTACAGTCAATTTCGA<br/> GGCCACCTGGTCGACGGAGCGGTTCGGCAGCTGGAGCCACCCGAGTTCGAAAGTCGGCTTC<br/> CGCTGGAGGATTCCCTCGAGTCTCCAGCTGCGCCTGCTCCGGCAAGCCCTGCGAGC<br/> TGGAGCCACCCGAGTTCGAAAAATGAgaatccgattcaccatggtggatccgagctgctgctaacaag<br/> gcccgaaggaagctgagttgctgctgccaaccctgagcaataactagcataacccttggggccttaaacgggtcttgag<br/> gggtttttg</p>                                                                  | <p>MSNHTRYRVEIVGTS PDGVDAIIQGGLA<br/> RAAQTMRALDWFVEVQSIRGHLVDGAVA<br/> HFQVTMKVGFRLSDS*</p> <p>&amp;</p> <p>MSNHTRYRVEIVGTS PDGVDAIIQGGLA<br/> RAAQTMRALDWFVEVQSIRGHLVDGAVA<br/> HFQVTMKVGFRLSDS <b>LESPAAPAPASPA</b><br/> <b>SWSHQFEK*</b></p>                                                                                                          |
| <i>bici</i><br>( <i>mtDod-PAS-StreplI</i> ;<br><i>mtDod</i> (WT))                         | <p>cccgcaaaataacgactcaactataggggaattgtgagcggataaacaattcccctctagaataattttgtaactttaagaag<br/> gagatatacatATGAGCAATCACACCTACCGAGTGATCGAGATCGTCGGGACCTCGCCCCGA<br/> CGCGCTCGACGCGGCAATCCAGGGCGGTCTGGCCGAGCTGCGCAGACCATGCGCGC<br/> CGCTGGACTGGTTCGAAGTACAGTCAATTTCGAGGCCACCTGGTCGACGGAGCGGTCC<br/> CGCACTCCAGGTGACTATGAAAGTCGGCTTCGGCCTGGAGGATTCCCTGAgggttgaaac<br/> <b>ttccgagga</b>gaattcaataattttgtaactttaagaagagagatatacatATGAGCAATCACACCTACCGAGTGA<br/> TCGAGATCGTCGGGACCTCGCCGACGCGCTCGACGCGCAATCCAGGGCGGTCTG<br/> GCCGAGCTGCGCAGACCATGCGCGCGCTGGACTGGTTCGAAGTACAGTCAATTTCGA<br/> GGCCACCTGGTCGACGGAGCGGTTCGGCAGCTGGAGCCACCCGAGTTCGAAAGTCGGCTTC<br/> CGCTGGAGGATTCCCTCGAGTCTCCAGCTGCGCCTGCTCCGGCAAGCCCTGCGAGC<br/> CAATTTCGAGGCCACCTGGTCGACGGAGCGGTTCGGCAGCTTCAGGTGACTATGAAAG<br/> TCGGCTTCGGCCTGGAGGATTCCCTGAgaatccgattcaccatggtggatccgagctgctgctaacaag<br/> ccggaaggaagctgagttgctgctgccaaccctgagcaataactagcataacccttggggccttaaacgggtcttgagg<br/> gggtttttg</p> | <p>MSNHTRYRVEIVGTS PDGVDAIIQGGLA<br/> RAAQTMRALDWFVEVQSIRGHLVDGAVA<br/> HFQVTMKVGFRLSDS <b>LESPAAPAPASPA</b><br/> <b>SWSHQFEK*</b></p> <p>&amp;</p> <p>MSNHTRYRVEIVGTS PDGVDAIIQGGLA<br/> RAAQTMRALDWFVEVQSIRGHLVDGAVA<br/> HFQVTMKVGFRLSDS*</p>                                                                                                          |
| <i>tricus</i><br>( <i>mtDod</i> (WT);<br><i>mtDod</i> (WT);<br><i>mtDod-PAS-StreplI</i> ) | <p>cccgcaaaataacgactcaactataggggaattgtgagcggataaacaattcccctctagaataattttgtaactttaagaag<br/> gagatatacatATGAGCAATCACACCTACCGAGTGATCGAGATCGTCGGGACCTCGCCCCGA<br/> CGCGCTCGACGCGGCAATCCAGGGCGGTCTGGCCGAGCTGCGCAGACCATGCGCGC<br/> CGCTGGACTGGTTCGAAGTACAGTCAATTTCGAGGCCACCTGGTCGACGGAGCGGTCC<br/> CGCACTCCAGGTGACTATGAAAGTCGGCTTCGGCCTGGAGGATTCCCTGAgggttgaaac<br/> <b>ttccgagga</b>gaattcaataattttgtaactttaagaagagagatatacatATGAGCAATCACACCTACCGAGTGA<br/> TCGAGATCGTCGGGACCTCGCCGACGCGCTCGACGCGCAATCCAGGGCGGTCTG<br/> GCCGAGCTGCGCAGACCATGCGCGCGCTGGACTGGTTCGAAGTACAGTCAATTTCGA<br/> GGCCACCTGGTCGACGGAGCGGTTCGGCAGCTTCAGGTGACTATGAAAGTCGGCTTC<br/> CGCTGGAGGATTCCCTGAgactctgagctgctaacaagccggaaggaagctgagttgctgctgccaaccctgagcaataact<br/> agcataacccttggggccttaaacgggtcttgagggtttttg</p>                                                                                                                                                                          | <p>MSNHTRYRVEIVGTS PDGVDAIIQGGLA<br/> RAAQTMRALDWFVEVQSIRGHLVDGAVA<br/> HFQVTMKVGFRLSDS*</p> <p>&amp;</p> <p>MSNHTRYRVEIVGTS PDGVDAIIQGGLA<br/> RAAQTMRALDWFVEVQSIRGHLVDGAVA<br/> HFQVTMKVGFRLSDS*</p> <p>&amp;</p> <p>MSNHTRYRVEIVGTS PDGVDAIIQGGLA<br/> RAAQTMRALDWFVEVQSIRGHLVDGAVA<br/> HFQVTMKVGFRLSDS <b>LESPAAPAPASPA</b><br/> <b>SWSHQFEK</b></p> |
| <i>mtDod-proteins</i>                                                                     | <p><b>DNA sequence</b><br/> <b>T7 promotor to T7 terminator</b><br/> <b>(CDS uppercase)</b></p>                                                                                                                                                                                                                                                                                                                                                                                                                                                                                                                                                                                                                                                                                                                                                                                                                                                                   | <p><b>Amino acid sequence</b><br/> <b>(linker)</b></p>                                                                                                                                                                                                                                                                                                    |



|                               |                                                                                                                                                                                                                                                                                                                                                                                                                                                                                                                                                                                                                                                                                                                                                                                                                                                                                                                                     |                                                                                                                                                                                                                                                                                                                                                                                                                           |
|-------------------------------|-------------------------------------------------------------------------------------------------------------------------------------------------------------------------------------------------------------------------------------------------------------------------------------------------------------------------------------------------------------------------------------------------------------------------------------------------------------------------------------------------------------------------------------------------------------------------------------------------------------------------------------------------------------------------------------------------------------------------------------------------------------------------------------------------------------------------------------------------------------------------------------------------------------------------------------|---------------------------------------------------------------------------------------------------------------------------------------------------------------------------------------------------------------------------------------------------------------------------------------------------------------------------------------------------------------------------------------------------------------------------|
| <p><i>mtDod-mmACP</i></p>     | <p>cccgcaaaataacgactcaactataggggaattgtgagcggataacaattcccctcagaataattttgtaactttaagaag<br/>gagatatacatATGAGCAATCACACCTACCGAGTGATCGAGATCGTCGGGACCTCGCCCGA<br/>CGGCGTCGACGCGGCAATCCAGGGCGGTCTGGCCGAGCTGCGCAGACCATGCGCG<br/>CGCTGGACTGGTTCGAAGTACAGTCAATTTCGAGGCCACCTGGTCGACGGAGCGGTCC<br/>CGCACTCCAGGTGACTATGAAAGTCGGCTTCCGCTGGAGGATTCCCTCGAGTCTCC<br/>AGCTGCGCCTGCTCCGGCAAGCCTCGGAGCGACGGGACACCCAGAGGGATCTGG<br/>TGAAGCTGTAGCACACATCTAGGCATCCGAGACCTCGAGGTATTAACCTGGACAG<br/>CAGCTGGCAGACCTCGGCTGGACTCGCTCATGGGTGTGGAAGTTCGTGAGATCTC<br/>GAAACGAGAACACGATCTGGTCTGCCATCGTGAGGTGCGGCAGCTCACGCTGCC<br/>GAACTTACGAAATGTCTCCAAGACTGACTCGGCTACTGACACGACAGCCCGCTGA<br/>gatccggctgtaacaaagccgaaagagctgagtgctgctgccaccgctgagcaataactagcataacccttggggc<br/>ctaaacgggtctgaggggtttttg</p>                                                                                                                                                          | <p>MSNHTRYRVEIVGTS PDGVDAIQGGLA<br/>RAAQTMRALDWFVEVQSIRGHLVDGAVA<br/>HFQVTMKVGFRLDLS <b>LESPAAPAPASPA</b><br/><b>S</b>DGDTQRDLVKAVAHILGIRDLAGINLDS<br/>TLADLGLDLSMGVEVROILEREHLVLP<br/>MREVRQLTLRKLQEMSSKSDSATDITPA<br/>*</p>                                                                                                                                                                                             |
| <p><i>mtDod-mmACP-H8</i></p>  | <p>cccgcaaaataacgactcaactataggggaattgtgagcggataacaattcccctcagaataattttgtaactttaagaag<br/>gagatatacatATGAGCAATCACACCTACCGAGTGATCGAGATCGTCGGGACCTCGCCCGA<br/>CGGCGTCGACGCGGCAATCCAGGGCGGTCTGGCCGAGCTGCGCAGACCATGCGCG<br/>CGCTGGACTGGTTCGAAGTACAGTCAATTTCGAGGCCACCTGGTCGACGGAGCGGTCC<br/>CGCACTCCAGGTGACTATGAAAGTCGGCTTCCGCTGGAGGATTCCCTCGAGTCTCC<br/>AGCTGCGCCTGCTCCGGCAAGCCTCGGAGCGACGGGACACCCAGAGGGATCTGG<br/>TGAAGCTGTAGCACACATCTAGGCATCCGAGACCTCGCAGGTATTAACCTGGACAG<br/>CAGCTGGCAGACCTCGGCTGGACTCGCTCATGGGTGTGGAAGTTCGTGAGATCTC<br/>GAAACGAGAACACGATCTGGTCTGCCATCGTGAGGTGCGGCAGCTCACGCTGCC<br/>GAACTTACGAAATGTCTCCAAGACTGACTCGGCTACTGACACGACAGCCCGCTCG<br/>GAGCATCATACCACCCACCCACTGAgatccggctgtaacaaagccgaaagagctgagtg<br/>gctgctgccaccgctgagcaataactagcataacccttggggcctaaacgggtctgaggggtttttg</p>                                                                                                                               | <p>MSNHTRYRVEIVGTS PDGVDAIQGGLA<br/>RAAQTMRALDWFVEVQSIRGHLVDGAVA<br/>HFQVTMKVGFRLDLS <b>LESPAAPAPASPA</b><br/><b>S</b>DGDTQRDLVKAVAHILGIRDLAGINLDS<br/>TLADLGLDLSMGVEVROILEREHLVLP<br/>MREVRQLTLRKLQEMSSKSDSATDITPA<br/><b>LE</b>HHHHHHHH*</p>                                                                                                                                                                            |
| <p><i>mtDod-msfGFP-H8</i></p> | <p>cccgcaaaataacgactcaactataggggaattgtgagcggataacaattcccctcagaataattttgtaactttaagaag<br/>gagatatacatATGAGCAATCACACCTACCGAGTGATCGAGATCGTCGGGACCTCGCCCGA<br/>CGGCGTCGACGCGGCAATCCAGGGCGGTCTGGCCGAGCTGCGCAGACCATGCGCG<br/>CGCTGGACTGGTTCGAAGTACAGTCAATTTCGAGGCCACCTGGTCGACGGAGCGGTCC<br/>CGCACTCCAGGTGACTATGAAAGTCGGCTTCCGCTGGAGGATTCCCTCGAGTCTCC<br/>AGCTGCGCCTGCTCCGGCAAGCCTCGGAGCGACGGGACACCCAGAGGGATCTGG<br/>TGAAGCTGTAGCACACATCTAGGCATCCGAGACCTCGCAGGTATTAACCTGGACAG<br/>CAGCTGGCAGACCTCGGCTGGACTCGCTCATGGGTGTGGAAGTTCGTGAGATCTC<br/>GAAACGAGAACACGATCTGGTCTGCCATCGTGAGGTGCGGCAGCTCACGCTGCC<br/>GAACTTACGAAATGTCTCCAAGACTGACTCGGCTACTGACACGACAGCCCGCTCG<br/>GAGCATCATACCACCCACCCACTGAgatccggctgtaacaaagccgaaagagctgagtg<br/>gctgctgccaccgctgagcaataactagcataacccttggggcctaaacgggtctgaggggtttttg</p>                                                                                                                               | <p>MSNHTRYRVEIVGTS PDGVDAIQGGLA<br/>RAAQTMRALDWFVEVQSIRGHLVDGAVA<br/>HFQVTMKVGFRLDLS <b>LESPAAPAPASPA</b><br/><b>S</b>VSKGEELFTGVVPIVLELDGVDNGHKF<br/>SVRGEGEDATNGKLTAKFICTHMKLPV<br/>PWPLTVTLTYGVQCFSRYPDTHMKQHD<br/>FFKSAMPEGVYQERTISFKDDGYTKTRA<br/>EVKFEGLDNLNRIKIDFKEDGNILGH<br/>KLEYNFNHNVYITADKQKNGIKANFKIR<br/>HNVEDGSQLADHYQNTPIGDGPVLLF<br/>PDNHYLSTQSKLSDPNEKRDHMLVLEF<br/>VTAAGITLGMDE <b>LE</b>HHHHHHHH*</p> |
| <p><i>mtDod-SpyC-H8*</i></p>  | <p>cccgcaaaataacgactcaactataggggaattgtgagcggataacaattcccctcagaataattttgtaactttaagaag<br/>gagatatacatATGAGCAATCACACCTACCGAGTGATCGAGATCGTCGGGACCTCGCCCGA<br/>CGGCGTCGACGCGGCAATCCAGGGCGGTCTGGCCGAGCTGCGCAGACCATGCGCG<br/>CGCTGGACTGGTTCGAAGTACAGTCAATTTCGAGGCCACCTGGTCGACGGAGCGGTCC<br/>CGCACTCCAGGTGACTATGAAAGTCGGCTTCCGCTGGAGGATTCCCTCGAGTCTCC<br/>AGCTGCGCCTGCTCCGGCAAGCCTCGGAGCGACGGGACACCCAGAGGGATCTGG<br/>TGAAGCTGTAGCACACATCTAGGCATCCGAGACCTCGCAGGTATTAACCTGGACAG<br/>CAGCTGGCAGACCTCGGCTGGACTCGCTCATGGGTGTGGAAGTTCGTGAGATCTC<br/>GAAACGAGAACACGATCTGGTCTGCCATCGTGAGGTGCGGCAGCTCACGCTGCC<br/>GAACTTACGAAATGTCTCCAAGACTGACTCGGCTACTGACACGACAGCCCGCTCG<br/>GAGCATCATACCACCCACCCACTGAgatccggctgtaacaaagccgaaagagctgagtg<br/>gctgctgccaccgctgagcaataactagcataacccttggggcctaaacgggtctgaggggtttttg</p>                                                                                                                               | <p>MSNHTRYRVEIVGTS PDGVDAIQGGLA<br/>RAAQTMRALDWFVEVQSIRGHLVDGAVA<br/>HFQVTMKVGFRLDLS <b>LESPAAPAPASPA</b><br/><b>S</b>AMVDTLGSLSEEGQSDMTIEEDSA<br/>THIKFSKREDGKELAGATMELRDSGK<br/>TISTWSDGQVTKFYLPYKTYFVETAAP<br/>DGYEVATAITFTVNEQQVTVNGKATKG<br/>DAH <b>LE</b>HHHHHHHH*</p>                                                                                                                                              |
| <p><i>H8-SpyC-mtDod</i></p>   | <p>cccgcaaaataacgactcaactataggggaattgtgagcggataacaattcccctcagaataattttgtaactttaagaag<br/>gagatatacatATGATCATACACCACCCACCATCAGGTTCTGCTATGGTGGACACCTCG<br/>TCCGGCCTCTAGTGAACAGGGGCAAGCGGCGATATGACTATCGAAGAAGATAGTG<br/>CTACCCATATAAATTTCTCAAACGTGATGAGGACGGCAAGAGTGTAGCTGGTGAAC<br/>ATGAGGTTGCGTATCATCTGGTAAACTATTAGTACATGGATTTTCAGATGGACAAGT<br/>GAAAGATTCTACCTGTATCCAGGAAAAATATACATTTGTGCAAAACCGACAGCGG<br/>GTTATGAGGTAGCAACTGCTATTACCTTTACAGTTAATGAGCAAGGTGACGTTACTGT<br/>AATGGCAAAGCAACTAAAGGTGACGCTCATATTTCTCCAGCTGCGCCTGCTCCGGCAA<br/>GCCCTGCGAGCAGCAATCACACCTACCGAGTGATCGAGATCGTCGGGACCTCGCCCG<br/>AGCGCTCGACGCGCAATCCAGGGCGGTCTGGCCGAGCTGCGCAGACCATGCGCG<br/>GCGCTGGACTGGTTCGAAGTACAGTCAATTTCGAGGCCACCTGGTCGACGGAGCGGT<br/>GCGCACTTCCAGGTGACTATGAAAGTCGGCTTCCGCTGGAGGATTCCCTGActgagcacc<br/>accaccaccaccaccactgagatccggctgtaacaaagccgaaagagctgagtggtgctgccaccgctgagcaataact<br/>agcataacccttggggcctaaacgggtctgaggggtttttg</p> | <p>MHHHHHHH <b>GS</b>AMVDTLGSLSEEGQ<br/>SGDMTIEEDSATHIKFSKREDGKELAG<br/>ATMELRDSGKTIWSDGQVDFYLY<br/>PGKYTFVETAAPDGYEVATAITFTVNEQ<br/>QVTVNGKATKGDH <b>SP</b>AAPAPASPA<br/>SNHTRYRVEIVGTS PDGVDAIQGGLA<br/>AQTMRALDWFVEVQSIRGHLVDGAVA<br/>HFQVTMKVGFRLDLS*</p>                                                                                                                                                             |
| <p><i>mtDod-SZ1</i></p>       | <p>cccgcaaaataacgactcaactataggggaattgtgagcggataacaattcccctcagaataattttgtaactttaagaag<br/>gagatatacatATGAGCAATCACACCTACCGAGTGATCGAGATCGTCGGGACCTCGCCCGA<br/>CGGCGTCGACGCGGCAATCCAGGGCGGTCTGGCCGAGCTGCGCAGACCATGCGCG<br/>CGCTGGACTGGTTCGAAGTACAGTCAATTTCGAGGCCACCTGGTCGACGGAGCGGTCC<br/>CGCACTCCAGGTGACTATGAAAGTCGGCTTCCGCTGGAGGATTCCCTCGAGTCTCC<br/>AGCTGCGCCTGCTCCGGCAAGCCTCGGAGCGACGGGACACCCAGAGGGATCTGG<br/>AGTAGCATCATTAGAGAATGAAACGAAACCTTGAAAGAAAGAACTACACAAAAAGG<br/>ATCTTATAGCCTACCTAGAAAAGGAAATGCTAATTAAGGAAAAGGATGAGGAATGAG<br/>gatccaccaccaccaccactgagatccggctgtaacaaagccgaaagagctgagtggtgctgccaccgctgagcaataact<br/>gcaataactagcataacccttggggcctaaacgggtctgaggggtttttg</p>                                                                                                                                                                                                                                               | <p>MSNHTRYRVEIVGTS PDGVDAIQGGLA<br/>RAAQTMRALDWFVEVQSIRGHLVDGAVA<br/>HFQVTMKVGFRLDLS <b>LESPAAPAPASPA</b><br/><b>S</b>NLVAQLENEVASLENETLKKNLHK<br/>KDLIAYLEKEIANLRKKIE*</p>                                                                                                                                                                                                                                               |
| <p><i>mtDod-SZ3</i></p>       | <p>cccgcaaaataacgactcaactataggggaattgtgagcggataacaattcccctcagaataattttgtaactttaagaag<br/>gagatatacatATGAGCAATCACACCTACCGAGTGATCGAGATCGTCGGGACCTCGCCCGA<br/>CGGCGTCGACGCGGCAATCCAGGGCGGTCTGGCCGAGCTGCGCAGACCATGCGCG<br/>CGCTGGACTGGTTCGAAGTACAGTCAATTTCGAGGCCACCTGGTCGACGGAGCGGTCC<br/>CGCACTCCAGGTGACTATGAAAGTCGGCTTCCGCTGGAGGATTCCCTCGAGTCTCC<br/>AGCTGCGCCTGCTCCGGCAAGCCTCGGAGCGACGGGACACCCAGAGGGATCTGG<br/>AGTAGCATCATTAGAGAATGAAACGAAACCTTGAAAGAAAGAACTACACAAAAAGG<br/>ATCTTATAGCCTACCTAGAAAAGGAAATGCTAATTAAGGAAAAGGATGAGGAATGAG<br/>gatccaccaccaccaccactgagatccggctgtaacaaagccgaaagagctgagtggtgctgccaccgctgagcaataact<br/>gcaataactagcataacccttggggcctaaacgggtctgaggggtttttg</p>                                                                                                                                                                                                                                               | <p>MSNHTRYRVEIVGTS PDGVDAIQGGLA<br/>RAAQTMRALDWFVEVQSIRGHLVDGAVA<br/>HFQVTMKVGFRLDLS <b>LESPAAPAPASPA</b><br/><b>S</b>NEVTLENDAAFIENENAYLEKEIARLR<br/>KEKAALRNRLAHHK*</p>                                                                                                                                                                                                                                                 |

|                                  |                                                                                                                                                                                                                                                                                                                                                                                                                                                                                                                                                                                                                                                                                                                                                                                                                                                                                                                                                                                                                                                                                                                                                                                                                                                                                                                                                                                                                                                            |                                                                                                                                                                                                                                                                                                                                                                                                                                                                                 |
|----------------------------------|------------------------------------------------------------------------------------------------------------------------------------------------------------------------------------------------------------------------------------------------------------------------------------------------------------------------------------------------------------------------------------------------------------------------------------------------------------------------------------------------------------------------------------------------------------------------------------------------------------------------------------------------------------------------------------------------------------------------------------------------------------------------------------------------------------------------------------------------------------------------------------------------------------------------------------------------------------------------------------------------------------------------------------------------------------------------------------------------------------------------------------------------------------------------------------------------------------------------------------------------------------------------------------------------------------------------------------------------------------------------------------------------------------------------------------------------------------|---------------------------------------------------------------------------------------------------------------------------------------------------------------------------------------------------------------------------------------------------------------------------------------------------------------------------------------------------------------------------------------------------------------------------------------------------------------------------------|
| SZ1- <i>mtDod</i>                | <p>cccgcgaataatacgaactactataggggaattgtgagcggataacaattcccctctagaataattttgtaactttaagaag<br/> gagatacatATGAATCTAGTCTAGCTAGTAGAACAAGTAGCATCATTAGAGAATGAA<br/> AACGAAACCTTGAAAAAGAGAAATCTACACAAAAAGGATCTTATAGCCTACCTAGAAAA<br/> GGAAATTGCTAACTTAAAGAAAAAGATTGAGGAATCTCCAGCTGCGCCTGCTCCGGCA<br/> AGCCCTGCGAGCAGCAATCACACCTACCGAGTGTGAGATCGTCGGGACCTCGCC<br/> CAGCGCTGCAGCGGCAATCCAGGGCGGTGCGCCGAGCTGCGCAGACCATGCG<br/> CGCGTGGACTGGTTGCAAGTACAGTCAATTCGAGGCCACTGCGCCGCTGGAGGATTCCCTGAggatcca<br/> ccaccaccaccaccagatcggctgctaacaagccggaaggaagctgagttggctgcccagctgagcaata<br/> actagcataacccttggggcctctaaacgggctctgaggggtttttg</p>                                                                                                                                                                                                                                                                                                                                                                                                                                                                                                                                                                                                                                                                                                                                                                                                                                | <p>MNLVAQLENEVASLENETLKKKLNHK<br/> KDLIAYLEKEIANLRKIEE <b>SPAAPAPASP</b><br/> <b>ASN</b>HTYRVIEVGTSPDGVDAIIQGLLA<br/> RAAQTMRALDWFVEVGSIRGHLVDGAVA<br/> HFQVTMKVGFRLDS*</p>                                                                                                                                                                                                                                                                                                     |
| SZ3- <i>mtDod</i>                | <p>cccgcgaataatacgaactactataggggaattgtgagcggataacaattcccctctagaataattttgtaactttaagaag<br/> gagatacatATGAACGAAGTTACAACACTTGAGAATGACGCTGCCTTTATCGAAAAAGAA<br/> ATGCTTATAGAAAAAGAGATAGCACGTTTGGAAAGGAGAAAGCAGCATTGAGAAAT<br/> AGACTGGCACAAAAAGTCTCCAGCTGCGCCTGCTCCGGCAAGCCCTGCGAGCAGC<br/> GACACACTACCGAGTGTGAGATCGTCGGGACCTCGCCGAGCGCGTGCAGCGG<br/> GCAATCCAGGGCGGTCTGGCCGAGCTGCGCAGACCATGCGCGCGCTGGACTGGTTC<br/> GAAGTACAGTCAATTCGAGGCCACTGGTTCAGGGAGCGGTGCGCCACTTCCAGGTG<br/> ACTATGAAGTCCGCTTCCGCTGGAGGATTCTGAggatccaccaccaccaccactgagatc<br/> cggtgctaacaagccggaaggaagctgagttggctgcccagctgagcaataactagcataacccttggggcctc<br/> aacgggctctgaggggtttttg</p>                                                                                                                                                                                                                                                                                                                                                                                                                                                                                                                                                                                                                                                                                                                                                                                                 | <p>MNEVTTLENDAAFIENENAYLEKEIARLR<br/> KEKAALRNRLAHKK <b>SPAAPAPASP</b>ASN<br/> HTYRVIEVGTSPDGVDAIIQGLLARAQ<br/> TMRALDWFVEVGSIRGHLVDGAVAHFQV<br/> TMKVGFRLDS*</p>                                                                                                                                                                                                                                                                                                               |
| <i>mtDod-seACP**</i>             | <p>cccgcgaataatacgaactactataggggaattgtgagcggataacaattcccctctagaataattttgtaactttaagaag<br/> gagatacatATGAGCAATCACACTACCGAGTGTGAGATCGTCGGGACCTCGCCCGA<br/> CGGCTGCAGCGGCAATCCAGGGCGGTCTGGCCGAGCTGCGCAGACCATGCGCG<br/> CGTGGACTGGTTCGAAGTACAGTCAATTCGAGGCCACTGCTGACGAGCGGGTCCG<br/> CGACTTCCAGGTGACTATGAAGTCCGCTTCCGCTGGAGGATTCCCTcgagTCTCCA<br/> GCTGCGCCTGCTCCGGCAAGCCTGCGAGCGCGTACAGCAGATCGAGGACAAGTTG<br/> GGAAACTATATCCGAGGCACTGCTGACTGAGGACCTCCAGAGGAATTCCTACTT<br/> CCACCCTCTTCCGCGATGGGGTCTGGATTGCTGCTCCGGCTGGCGATGCTGATCA<br/> ACTTCATCCGCAACGAGCTGGCCGTGGAGATCCCGTACGAGCAGCTGAACCCGGGACG<br/> ACTTCCAGGATGTCACACTATGCCAAGATGGTGGTCCGCTGTCGAGCGAAGCGAA<br/> ACTCGAGCATCATCACACCACCACCCTGAgatccggctgctaacaagccggaaggaagct<br/> gagttggctgctgcccagctgagcaataactagcataacccttggggcctctaaacgggctctgaggggtttttg</p>                                                                                                                                                                                                                                                                                                                                                                                                                                                                                                                                                                                                                                        | <p>MSNHTYRVIEVGTSPDGVDAIIQGLLA<br/> RAAQTMRALDWFVEVGSIRGHLVDGAVA<br/> HFQVTMKVGFRLDS <b>LESPAAPAPASPA</b><br/> <b>SRV</b>DEIEDKLGNYIRRHLLTEDPPEEFT<br/> STALFGDGLDSLRLAMLINFIRNELAVEI<br/> PYEYHNRDDFFHDVHTIAKMVVLSSSEAK<br/> <b>LE</b>HHHHHHH*</p>                                                                                                                                                                                                                             |
| non-dodecin<br><i>constructs</i> | <p style="text-align: center;">DNA sequence<br/> T7 promoter to T7 terminator<br/> (CDS uppercase)</p>                                                                                                                                                                                                                                                                                                                                                                                                                                                                                                                                                                                                                                                                                                                                                                                                                                                                                                                                                                                                                                                                                                                                                                                                                                                                                                                                                     | <p style="text-align: center;">Amino acid sequence<br/> (linker)</p>                                                                                                                                                                                                                                                                                                                                                                                                            |
| SpyT- <i>seACP</i>               | <p>cccgcgaataatacgaactactataggggaattgtgagcggataacaattcccctctagaataattttgtaactttaagaag<br/> gagatacatATGCGACATATCGTCATGGTTGATGCGTACAAACCGACCAAGGTGGCAGC<br/> GGTCTCCAGCTGCGCCTGCTCCGGCAAGCCCTGCGAGCGCGGTAGACGAGATCGAG<br/> GACAAGTTGGAAACTATATCCGAGGCACCTGCTGACTGAGGACCTCCAGAGGAAT<br/> TCCTTACTCCACCCCTCTTCCGGCATGGGGTGTGGATTGCTGCTCCGGCTGGCGAT<br/> GCTGATCAACTTCAATCCGCAACGAGCTGGCCGTGGAGATCCCGTACGAGCAGCTGAAC<br/> CGGGACGACTTCCAGATGTGTCACACTATCGCAAGATGGTGGTCCGCTGTCGAGC<br/> GAAGCGAACTCGAGCATCATCACACCACCACCCTGAgatccggctgctaacaagccggaaggaagct<br/> aaggaagctgagttggctgctgcccagctgagcaataactagcataacccttggggcctctaaacgggctctgaggggtttt<br/> t</p>                                                                                                                                                                                                                                                                                                                                                                                                                                                                                                                                                                                                                                                                                                                                                                                                  | <p>MAHIVMVDAYKPTK <b>GGSGSPAAPAPAS</b><br/> <b>PAS</b>RVDEIEDKLGNYIRRHLLTEDPPEEF<br/> TYSTALFGDGLDSLRLAMLINFIRNELA<br/> VEIPEYHNRDDFFHDVHTIAKMVVLSS<br/> EAK <b>LE</b>HHHHHHH*</p>                                                                                                                                                                                                                                                                                              |
| <i>seACP-SpyC</i>                | <p>cccgcgaataatacgaactactataggggaattgtgagcggataacaattcccctctagaataattttgtaactttaagaag<br/> gagatacatATGCGCGTAGACGAGATCGAGGACAAGTTGGGAACTATATCCGAGGCA<br/> CCTGCTGACTGAGGACCTCCAGAGGAATTCCTTACTCCACCCCTCTTCCGGCAT<br/> GGGGTGTGGATTGCTCCGGCTGGCGATGCTGATCAACTTCAATCCGCAACGAGCTG<br/> CCGCTGGAGATCCCGTACGAGCAGCTGAACCCGGGACACTTCCAGCATGTGCACACT<br/> ATCCGCAAGATGGTGGTCCGGCTGTCGAGCGAAGGAAAGGTTGGCAGCGGTGCTATG<br/> GTGGACACCTGTCGGGCTCTTCTAGTGAACAGGGGCAAGCGGCGATATGACTATC<br/> GAAGAAGATAGTGTACCCATATTAATTTCTCAAACCGTGTGAGGAGCGCAAGAGATT<br/> AGCTGGTGAACACTATGAGTTGCGTGTATCTGGTAAACTATAGTACATGGATTT<br/> CAGATGGACAAGTGAAGATTTCTACTGTATCCAGGAAATATACATTTGTCGAAACC<br/> GCAGCACGAGCGTTATGAGGTAGCAACTGCTATTACCTTACAGTTAATGAGCAAGG<br/> TCAGGTTACTGTAATGGCAAGCAACTAAAGGTGAGCGCTCATATTTCCGAGCATCATC<br/> ACCACCACCACCCTGAgatccggctgctaacaagccggaaggaagctgagttggctgctgcccagct<br/> gagcaataactagcataacccttggggcctctaaacgggctctgaggggtttttgctgaaag</p>                                                                                                                                                                                                                                                                                                                                                                                                                                                                                                          | <p>MRVDEIEDKLGNYIRRHLLTEDPPEEFTY<br/> STALFGDGLDSLRLAMLINFIRNELAVEI<br/> PYEYHNRDDFFHDVHTIAKMVVLSSSEAK<br/> <b>GGSG</b>AMVDLTLGLSSEGGQSGDMTIEE<br/> DSATHIKFSKRDEKELAGATMELRDS<br/> SGKTIWISDGOVKDFLYLPGKYTFVE<br/> TAAPDGYEVATITFTVNEQGQVTVNGK<br/> ATKGDHIL <b>LE</b>HHHHHHH*</p>                                                                                                                                                                                             |
| <i>mClover3-SnpC</i>             | <p>cccgcgaataatacgaactactataggggaattgtgagcggataacaattcccctctagaataattttgtaactttaagaag<br/> gagatacatATGGTAGCAAGGGCGAGGAGCTGTTACCGGGGTGGTCCCATCTGG<br/> TCGAGCTGGACGGCGAGTAAACGGCCACAAGTTACGCGTCCGCGGCGAGGCGGAG<br/> GGCGATGCCACCAACGGCAAGCTGACCCTGAAGTTTATCTGCACCAACCGCAAGCTG<br/> CCCGTGCCTGGCCACCTCTGTGACCACCTTCCGGCTACGGCTGGCCTGCTTCCAGC<br/> CGTACCAGGACCATGAAGCAGCAGCTTCTCAAGTCCGGCATGCCGGAAGGCT<br/> ACGTCAGGAGCGCACCATCTTTCAAGGACGAGGCTACCTACAAGACCCGCGCGG<br/> AGGTGAAGTTGAGGGCGACACCCCTGGTGAACCGCATCGAGCTGAAGGGCATCGACT<br/> TCAAGGAGGACGGCAACATCCTGGGGCAAGCTGGAGTACAACCTTCAACAGCCACTA<br/> CGTCTATACAGCGCCACAAGCAGAAGAACTGCATCAAGGCTAACTTCAAGATCCCG<br/> CACAACTTGAAGACGGCAGCGTGCAGCTCGCCGACCACTACCAGCAGAAACACCCCG<br/> ATCGCGCAGCGCCCGTGTGCTGCCGACAACCACTACCTGAGCATCATGTCGCAAG<br/> CTGAGCAAGACCCCAACGAGAAGCGGATCACATGGTCTGCTGGAAGTTCTGTGACC<br/> GCCCGCGCATTACCCATGGCATGGATGAAGTGTATAAAGTGGCAGCGGTAGCGGT<br/> AGCGCAAGCCGCTGCGTGGTGGCTGTTAGCCTGCAGAAACAGCATCCCGACTAT<br/> CCGATATCTATGGCGGATTGATCAGAATGGGACCTATCAAAATGTCGCTACCGCGG<br/> AAGATGTTAACTGACCTTAAAGAACTGAGCGATGGCAAAATACCGCTTTTAAAAAT<br/> AGCGAACCCGCTGGCTATAAACCGGTGCAAGAAATAGCCGATTGTCGCGTTTCAGATTG<br/> TGAATGGCGAAGTGCATGTGACCACTTGTCCCGCAGGATATCCGGCTACATA<br/> TGAATTTACCAACCGTAAACATTTATACCAATGACCGATACCGCGAAACTCGAGC<br/> ATCATCACACCACCACCCTGAgatccggctgctaacaagccggaaggaagctgagttggctgctg<br/> ccaccctgagcaataactagcataacccttggggcctctaaacgggctctgaggggtttttgctgaaag</p> | <p>MVSKGEELFTGVVPIVLVDGDNVGHKF<br/> SVRGEEDATNGKLTLCFKITGKLPV<br/> PWPTLVTTFGYGVACFSRYPDHMKQHD<br/> FFKSAMPEGYVQERTISFKDDGTYKTRA<br/> EVKFEEDTLVNRNRIKIDGDFKEDGNILGH<br/> KLEYNFNSHYVITADKQKNCIKANFKIR<br/> HNVEDGSVQLADHYQQNTPIGDGPVLL<br/> PDNHYLSHQSKLSDPNEKRDHMLVLE<br/> FVTAAGITHGMDLKY <b>GGSGSGSG</b>KPL<br/> RGAVFSLQKQHPDPIYGAIDQNGTYQ<br/> NVRTGEDGKLTFKNLSDGKYRLEFENSEP<br/> AGYKPVQNKPIVAFQVNGEVRDVTISIVP<br/> QDIPATYEFNTGKHYITNEPIPK <b>LE</b>HHH<br/> HHHHH*</p> |



|                      |                                                                                                                                                                                                                                                                                                                                                                                                                                                                                                                                                                                                                                                                                                                                                                                                                                                                                                                                                                                                                                                                                                                                                                                          |                                                                                                                                                                                                                                                                                                                                                                                             |
|----------------------|------------------------------------------------------------------------------------------------------------------------------------------------------------------------------------------------------------------------------------------------------------------------------------------------------------------------------------------------------------------------------------------------------------------------------------------------------------------------------------------------------------------------------------------------------------------------------------------------------------------------------------------------------------------------------------------------------------------------------------------------------------------------------------------------------------------------------------------------------------------------------------------------------------------------------------------------------------------------------------------------------------------------------------------------------------------------------------------------------------------------------------------------------------------------------------------|---------------------------------------------------------------------------------------------------------------------------------------------------------------------------------------------------------------------------------------------------------------------------------------------------------------------------------------------------------------------------------------------|
| <p>SpYT-mClover3</p> | <pre>cccgcaaaataacgactcaactataggggaattgtgagcggataacaattcccctcagaataattttgtaactttaagaag gagataacatATGGCAGATATCGTCATGGTTGATGCGTACAAACCCGCAAGGTTGGCAGC GGTTCTGTGAGCAAGGGCGAGGAGCTGTTACCGGGGGTGGTCCCATCCTGGTCGAG CTGGACGGCGCAGCTAAACGGCCACAAGTTACGCGTCCCGGGCGAGGGCGAGGGCGA TGCCACCAACGGCAAGCTGACCCGTAAGTTTCATCTGACCAACCGGCAAGCTGCCCCT GCCCTGGCCACCCTCGTACACCTCGGCTACCGCGTGGCCCTGCTTACGCCGCTA CCCCGACCACATGAAGCAGCAGCTTCTTCAAGTCCGCGATGCCGGAAGGCTACGTC CAGGAGCGCCATCTCTTCAAGGACGAGCTACTACAAGACCCGCGCCGAGGTG AAGTTCGAGGGCGACACCTGGTGAACCGCATCGAGCTGAAGGGCATCGACTTCAAG GAGGACGGCAACATCCTGGGGCACAAAGCTGGAGTACAACCTCAACAGCCACTACGTC ATATACGGCCGACAGCAGAAAGAACTGCATCAAGGCTAACTTCAAGATCCGCCACAA CGTTGAGGACGGCAGCGTGCAGCTCGCCGACCACTACCAAGCAGAAACCCCATCGG CGACGGCCCGTGTCTGCTGCCGACAACTACCTGAGCCATCAGTCAAGCTGAG CAAAGACCCCAACGAGAAGCGGATCAGATGGTCTGCTGGAGTTCGAGTCCGACCCG CGGCAATTACCATGGATGAACTGTATAAACTCGAGCATCATCACCACCACC ACCACTAGatccggctgtaacaaagccgaaaggaagctgagttggctgctccaccgctgagcaataactagcata acccttggggccttaaacgggctctgaggggtttttg</pre>                                                                                                                                                  | <p>MAHIVMVDAYKPTK<b>GGSGS</b>VSKGEELFT<br/>GVVPIVLVELDGDVNGHKFSVRGEEGD<br/>ATNGKLTLLKFICTTGKLPVWPVTLVTFG<br/>YGVACFSRYPDHMKQHDFFKSAMPEGY<br/>VQERTISFKDDGTYKTRAEVKFEGDGLV<br/>NRIELKIDFKEDGNILGHKLEYNFNHSHY<br/>VYITADKQKNCIKANFKIRHNVEDGSVQL<br/>ADHYQNTPIGDGPVLLPDNHLYSHQSK<br/>LSKDPNEKRDMVLLFVTAAGITHGMD<br/>ELYK<b>LE</b>HHHHHHHHH*</p>                                                |
| <p>SZ2-mRuby3</p>    | <pre>cccgcaaaataacgactcaactataggggaattgtgagcggataacaattcccctcagaataattttgtaactttaagaag gagataacatATGGCCAGAAATGCATACCTTAAGGAAAAAGATTGCTAGATTGAAAAAGGAC AACTTACAATTAGAAAGAGATGAGCAAAAATCTTGAAGAAATCATTGCCAATTTGAGAGAT GAAATCGCCAGACTTGAAGATGAGGTGGCCCTCTCATGAACAAGGTGGCAGCGGTGTGT CTAAGGGCGAAGAGCTGATCAAGGAAAAATATGCGTATGAAGGTGGTTCATGGAAGGTT GGTCAACGGCCACCAATTAAGTGCACAGGTGAAGGAGAAGCGACACCGTACGAGGG AGTCAACACCATGAGGATCAAGTCAATCGAGGAGGAGCCCTGCCATTTGCGCTTTGAC ATTCTTGCACGCTGTTATGTATGCGAGCCGACCTTTATCAAGTACCCGCGCCGACAT CCCTGATTTCTTAAACAGTCCCTTCTGAGGGTTTTACTTGGGAAAGAGTTACGAGATA CGAAGATGGTGGAGTCTCACCGTCAAGCAGGACACAGCCTTGAAGATGGCCGAGCT CGTCTACAACGCTCAAGGTGAGAGGGTAAACTTTCCCTCCAATGGTCCCGTGTATGCGAG AAGAAGCAAGGGTGGGAGCCTAATACAGAGATGATGATCAGCAGAGATGGTGGT TGAGAGGATACACTGACATCGCACTGAAAGTGTGATGGTGGTGGCCATCGCACTGCAA CTTCTGACAACTTACAGTCAAAAAAGCCCTCGGGAACATCAAGATGCCCGGTTGTC CATGCCGTTGATCACCCTGGAAGGATCGAGGAGAGTGAACATGAAACCTACGTA TGCAAAGAGAAAGTGGCAGTTGCCAAATACAGCAACCTTGGTGGTGGCATGGACGAGCT GCAACGCTCGAGCATCATCACCACCACCACCACCTAGatccggctgtaacaaagccgaa aggaagctgagttggctgctccaccgctgagcaataactagcataacccttggggccttaaacgggctctgaggggtttttg</pre>                            | <p>MARNAYLRKKIARLKKDNLQLERDEQNL<br/>EKIANLRDEIARLENEVASHEQ<b>GGSGS</b>V<br/>KGEELIKENMRMKVMEGSVNGHQFKC<br/>TGEGERPPEYQVTRMKVIEGGPLPFA<br/>FDILATSFMYGSRFTIKYPADIPDFFKQSF<br/>PEGFTWERVTRYEDGGVTVTQDLSLE<br/>DGLVYVNVKVRGYNFNSNPGVMQKTK<br/>GWEPNTEMMYPADGGLRGTVDIALKVD<br/>GGHLLHCFNVTYRSKKTGNIMKMPGV<br/>HAVDHLRLEIESDNETYVVGREAVAK<br/>YSNLGGMDLEYK<b>LE</b>HHHHHHHHH*</p>                |
| <p>SZ2-mClover3</p>  | <pre>cccgcaaaataacgactcaactataggggaattgtgagcggataacaattcccctcagaataattttgtaactttaagaag gagataacatATGGCCAGAAATGCATACCTTAAGGAAAAAGATTGCTAGATTGAAAAAGGAC AACTTACAATTAGAAAGAGATGAGCAAAAATCTTGAAGAAATCATTGCCAATTTGAGAGAT GAAATCGCCAGACTTGAAGATGAGGTGGCCCTCTCATGAACAAGGTGGCAGCGGTGTGA GCAAGGGCGAGGAGCTGTTACCGGGGTGGTGGCCATCCTGGTGGAGTGGACGGC GAGCTAAACGGCCACAAGTTCAAGTCCCGCGGAGGGCGAGGGGATGCCACCAA CGCAAGCTGACCCGTAAGTTCATCTGACACCACCGCAAGCTGCCGTGCCCTGGCC CACCCTGTCGACACCTTCGGCTAGGGCTGGCCCTGCTTACCGCCGTCACCCGACCA CATGAAGCAGCAGCACTTCTTCAAGTCCCGCATGCCGGAAGGCTACGTCAGGAGCG CACCATCTCTTCAAGGACGACCGTACCTACAAGACCCGCGCGAGGTGAAGTTCGAG GGCGACACCCTGGTGAACCGCATCGAGCTGAAGGGCATCGACTTCAAGGAGGACGGC AACATCTCGGGCACAAGCTGAGTACAACCTTCAACAGCCATCGCTATATCAGCG CGGACAAGCAGAAGAACTGCATCAAGGCTAAGTCAAGATCCGCGCAACAGCTTGAAG CGGACGCTGCAGCTCGCCGACCACTACAGCAGAACACCCCATCGGCGACGGCCC CGTGCTGCTGCCGACAACTACCTGAGCCATCAGTCAAGCTGAGCAAAGACCC CAGTAAAGCGGATCAGATGGTCTGCTGGAGTTCGAGACCCGCGCGCATTACC CATGGCATGGATGAAGTGTATAAACTCGAGCATCATCACCACCACCACCACCTAGat ccggctgtaacaaagccgaaaggaagctgagttggctgctccaccgctgagcaataactagcataacccttggggcct taaacgggctctgaggggtttttg</pre>                                      | <p>MARNAYLRKKIARLKKDNLQLERDEQNL<br/>EKIANLRDEIARLENEVASHEQ<b>GGSGS</b>V<br/>KGEELFTGVVPIVLVELDGDVNGHKFSVR<br/>GEGEGDATNGKLTLLKFICTTGKLPVWPV<br/>TLVTFYGYVACFSRYPDHMKQHDFFK<br/>SAMPEGYVQERTISFKDDGTYKTRAEVK<br/>FEGDGLVNIELKIDFKEDGNILGHKLE<br/>YFNFNHSHYVYITADKQKNCIKANFKIRHN<br/>VEDGSVQLADHYQNTPIGDGPVLLPDN<br/>HYLHSHQSKLSKDPNEKRDMVLLFVTA<br/>AGITHGMDLEYK<b>LE</b>HHHHHHHHH*</p>      |
| <p>SZ4-mRuby3</p>    | <pre>cccgcaaaataacgactcaactataggggaattgtgagcggataacaattcccctcagaataattttgtaactttaagaag gagataacatATGCAGAAAGTGGCTGAATTGAAAAACAGAGTTGCTGTAAACTTAACAGAA ATGAACAATTGAAAAACAAGGTAGAAGAGTTGAAAAACCGTAATGCTTACCTGAAAAAC GAACCTGGCTACATTGAAAAATGAAGTCCCGAGATTGAGAACGATGTTGCTGAAGGTG GCAGCGGTGTGCTAAGGGCGAAGAGCTGATCAAGGAAAAATGCGTATGAAGGTGGT CATGGAAAGTTTCGGTCAACGGCCACCAATTAAGTGCACAGGTGAAGGAGAAGGCGA CCGTACGAGGGAGTCAAAACCATGAGGATCAAGTCAAGGAGGAGGAGCCCTGCCA TTTGGCTTTGACATCTTCCACCTGCTTTCATGTATGGCAGCCGTAACCTTTATCAAGTAC CGGCGGACATCCCTGATTTCTTAAACAGCTCTTTCCTGAGGGTTTTACTTGGGAAAG AGTTACGAGATACGAAAGTGGTGGAGTCTGACCGTCAAGGAGGACACCGCCTGAG GATGGCGAGCTGCTTCAACAGTCAAGTCAAGGAGGTTCAACTTTCCCTCCAATGGT CCGTGATGCAGAAAGACCAAGGGTGGGAGCCTAATACAGAGATGATGATCCAGC AGATGGTGGTCTGAGAGGATACACTGACATCGCACTGAAAGTGTGATGGTGGTGGCCAT CTGCACTGCAACTTCTGACAACTTACAGTCAAAAAAGACCGTCCGGAACATCAAGAT CGCCGGTGTCCATGCCGTTGATCACCCTGGAAGGATCGAGGAGAGTGAACATGA AACCTAGTAGTCAAAAGAGAAGTGGCAGTTGCCAAATACAGCAACCTTGGTGGTGGC ATGAGCAGAGTGTACAAGCTCGAGCATCATCACCACCACCACCACCTAGatccggctg taacaaagccgaaaggaagctgagttggctgctccaccgctgagcaataactagcataacccttggggccttaaacgg gctctgaggggtttttg</pre>                           | <p>MQKVAVELKNRVAVKLNREQLKKNKVEE<br/>LKNRNAYLKNELATLENEVARLENDVAE<br/><b>GGSGS</b>VSKGEELIKENMRMKVMEGSV<br/>GHQFKCTGEGRPEYGVQTRMKVIE<br/>GGPLPFAFDILATSFMYGSRFTIKYPADI<br/>PDDFKQSFPEGFTWERVTRYEDGGVTV<br/>VTQDLSLEDGELVYVNVKVRGYNFNSN<br/>PVMQKTKGWEPNTEMMYPADGGLRGT<br/>YDIALKVDGGGHLHCFNVTYRSKKT<br/>GNIMKMPGVHAVDHLRLEIESDNETYV<br/>QREAVAKYNSLHGGMDLEYK<b>LE</b>HHHHH<br/>HHHH*</p>     |
| <p>SZ4-mClover3</p>  | <pre>cccgcaaaataacgactcaactataggggaattgtgagcggataacaattcccctcagaataattttgtaactttaagaag gagataacatATGCAGAAAGTGGCTGAATTGAAAAACAGAGTTGCTGTAAACTTAACAGAA ATGAACAATTGAAAAACAAGGTAGAAGAGTTGAAAAACCGTAATGCTTACCTGAAAAAC GAACCTGGCTACATTAGAAAAATGAAGTCCCGAGATTGAGAACGATGTTGCTGAAGGTG GCAGCGGTGTGAGCAAGGGCGAGGAGCTGTTACCGGGGGTGGTCCCATCCTGGTC GAGCTGGACGGCGCAGTAAACGGCCACAAGTTACGCGTCCGCGCGAGGGCGAGGG CGATGCCACCAACGGCAAGCTGACCCGTAAGTTTCATCTGACACCACCGCAAGCTGCC CGTGCCCTGGCCACCCTCGTACACCTCGGCTACGGCGTGGCCCTGCTTACGCCG CTACCCGACCACATGAAGCAGCAGCTTCAAGTCCGCGCATGCCGGAAGGCTAC GTCCAGGAGCGCACCATCTTCAAGGACAGCGTACTACAAGACCCGCGCCGAG GTGAAGTTGAGGGCGACACCTGGTGAACCGCATCGAGCTGAAGGGCATCGACTTCA AAGGAGGACGGCAACATCCTGGGCGCAAGCTGGAGTACAACCTTCAACAGCCACTAC GTCTATACCGGCGCAAGCAGAAAGAACTGCATCAAGGCTAAGTTCGAAGATCCGCC ACAACGTTGAGGACGGCAGCTGCGAGTCCGCGACCACTACCAAGCAGAAACCCCA TCGGCGAGCGCCCGTGTCTGCTGCCGACAACTACCTGAGCCATCAGTCCAAGC TGAGCAAAGACCCCAACGAGAAGCGGATCAGATGGTCTGCTGGAGTTCGAGCCG CCGCGGCATACCATGGCATGGATGAACTGTATAAACTCGAGCATCATCACCACCA CCACCACCTAGatccggctgtaacaaagccgaaaggaagctgagttggctgctccaccgctgagcaataactagcataacccttggggccttaaacgg tagcataacccttggggccttaaacgggctctgaggggtttttg</pre> | <p>MQKVAVELKNRVAVKLNREQLKKNKVEE<br/>LKNRNAYLKNELATLENEVARLENDVAE<br/><b>GGSGS</b>VSKGEELFTGVVPIVLVELDGDVNG<br/>HKFSVRGEGEGDATNGKLTLLKFICTTGK<br/>LPVWPVTLVTFYGYVACFSRYPDHMK<br/>QHDFFKSAMPEGYVQERTISFKDDGTYK<br/>TRAEVKFEGDGLVNIELKIDFKEDGNIL<br/>LGHKLEYNFNHSHYVYITADKQKNCIKAN<br/>KIRHNVEDGSVQLADHYQNTPIGDGPV<br/>LLPDNHLYSHQSKLSKDPNEKRDMVLL<br/>FVTAAGITHGMDLEYK<b>LE</b>HHHHHHHHH*</p> |

|                     |                                                                                                                                                                                                                                                                                                                                                                                                                                                                                                                                                                                                                                                                                                                                                                                                                                                                                                                                                                                        |                                                                                                                                                                                                                                                                                                      |
|---------------------|----------------------------------------------------------------------------------------------------------------------------------------------------------------------------------------------------------------------------------------------------------------------------------------------------------------------------------------------------------------------------------------------------------------------------------------------------------------------------------------------------------------------------------------------------------------------------------------------------------------------------------------------------------------------------------------------------------------------------------------------------------------------------------------------------------------------------------------------------------------------------------------------------------------------------------------------------------------------------------------|------------------------------------------------------------------------------------------------------------------------------------------------------------------------------------------------------------------------------------------------------------------------------------------------------|
| <p><i>mmACP</i></p> | <p>cccgcgaaattaacgactcaataggggaattgtgagcggataacaattcccctctagaataattttgtaactttaagaag<br/> gagatatacatATGAGCGCTTGGAGCCACCCGCAGTTCGAAAAAGCGCCGGGACGGGG<br/> ACACCCAGAGGGATCTGGTGAAAGCTGTAGCACACATCCTAGGCATCCGAGACCTCGC<br/> AGGTATTAACCTGGACAGCAGCTGGCAGACCTCGGCCTGGACTCGCTCATGGGTGT<br/> GGAAGTTGTCAGATCCTGGAACGAGAACACGATCTGGTGCTGCCATGCGTGAGGT<br/> GCGGCAGCTCACGCTGCGGAAACTTCAGGAAATGTCCTCCAAGACTGACTCGGCTACT<br/> GACACGACAGCCCCCTCGAGCATCATCACCACCACCACTGAgatccggctgctaa<br/> caaagcccgaaggagctgagttgctgctgccaccgctgagcaataactgcataacccttggggcctctaaacgggtctt<br/> gaggggtttttg</p>                                                                                                                                                                                                                                                                                                                                                                                                 | <p>MSAWSHQPFEK<b>G</b>AGDGDTRDRLVKAV<br/> AHILGIRDLAGINLDSTLADLGLDSLMLGV<br/> EVRQILEREHDLVLPMPREVRQLTLRKLQ<br/> EMSSKTDSATDTTAP<b>L</b>EHHHHHHHH*</p>                                                                                                                                               |
| <p><i>Sfp</i></p>   | <p>tcataaaaaatttattgctttgtgagcggataacaattataatagattcaattgtgagcggataacaatttcacacagaattctgcag<br/> acggaggatctagaATGAAGATTTACGGAATTTATATGGACCGCCGCTTTCACAGGAAGAAA<br/> ATGAACGGTTCATGACTTTCATATCACCTGAAAAACGGGAGAAATGCCGAGATTTTAT<br/> CATAAAGAAGATGCTCACCGCACCTGCTGGGAGATGTGCTCGTTCAGTCATAA<br/> GCAGGCAGTATCAGTTGGACAAATCCGATATCCGCTTTAGCACGCAGGAATACGGGAA<br/> GCCGTGCATCCCTGATCTTCCCGACGCTCATTTCAACATTTCTACTCCGGCCGCTGG<br/> GTCATTGGTGCGTTTGATTACAGCCGATCGGCATAGATATCGAAAAACGAAACCGAT<br/> CAGCCTTGAGATCGCCAAGCGCTTCTTTTCAAAAACAGAGTACAGCGACCTTTTAGCAA<br/> AAGACAAGGACGAGCAGACAGACTATTTTATCATCTATGGTCAATGAAGAAGCTTT<br/> ATCAACAGGAAGGCAAGGCTTATCGCTCCCGCTTGATTCCTTTTCAGTGCGCCTGCA<br/> TCAGGACGGACAAGTATCCATTGAGCTTCCGGACAGCCATTCGCCATGCTATATCAAAA<br/> CGTATGAGGTCGATCCCGGCTACAAAATGGCTGTATGCGCCGCACACCCCTGATTTCCC<br/> CGAGGATATCACAATGGTCTCGTACGAAGAGCTTTTAAAGATCTCATCACCATCACCATC<br/> ACTAAgcttaattagctgagcttgactcctgtgatagatccaglaatgacacagaactccatctgagttgttcagaagcctc</p> | <p>MKIYGIYMDRPLSQEENERFMTFISPEKR<br/> EKRRRFYHKEDAHRTLLGDVLRVRSVISR<br/> QYQLDKSDIRFSTQEYKPCIPDLPAH<br/> FNISHSGRWVIGAFDSQPIGIDIEKTPIS<br/> LEIAKRFFSKTEYSDLLAKDKDEQTDYFY<br/> HLWSMKESFIKQEGKLSLPLDSFSVRL<br/> HQDGGVSIELPDSHSPCYIKTYEVDPGY<br/> KMAVCAAHPDFPEDITMVSYEELL<b>RS</b>HH<br/> HHHH*</p> |

**Table S2:** Amino acid sequence of proteins from which the peptide sequences were selected for the *mtDod-PAS-Pep* constructs. Selected peptide sequences highlighted in red.

| Construct & peptide                      | Identifier & name                                                                            | Amino acid sequence<br>(peptide)                                                                                                                                                                                                                                                                                                                                                                                                                                                                                                                                                                                                                                                                                                                                                                                                                                                                                                                                                                                                                                              |
|------------------------------------------|----------------------------------------------------------------------------------------------|-------------------------------------------------------------------------------------------------------------------------------------------------------------------------------------------------------------------------------------------------------------------------------------------------------------------------------------------------------------------------------------------------------------------------------------------------------------------------------------------------------------------------------------------------------------------------------------------------------------------------------------------------------------------------------------------------------------------------------------------------------------------------------------------------------------------------------------------------------------------------------------------------------------------------------------------------------------------------------------------------------------------------------------------------------------------------------|
| <i>mtDod-PAS-Pep1</i><br>PKGGSQSGPTIEEVD | AAD21816.1 HSP70-1<br>[Homo sapiens]                                                         | MAKAAAGIDLGTYSVGVFQHGKVEIANDQGNRTTPSYVAFTDTERLIGDAAKNQVALNPQNTVFDALRIGRKF<br>GDPVQSDMKHWPQVINDGDKPKVQVSYKGDTKAFYPEEISSMVLTKMKEIAEAYLGYPTNAVITVPAVFNDSQ<br>RQATKADAGVIAGLNLRIINEPTAAAIAYGLDRTGKGERNLVIFDLGGGTFDVSILTDIDGIFEVKATAGDTHLGGEDF<br>DNRLVNHVEEYFKRHHKDKISQNKRAVRRRLTACERAKRTLSSSTQASLEIDSLFEGDIFGYSITRARRFEELCSDLFR<br>STLEPVEKALRDAKLDKAQIHLVLVGGSTRIPKVKQLQDFNQRDLNKSINPDEAVAYGAAVQAAILMGDKSENV<br>QDLLLLDVAPLSLGLTAGGVMALIKRNSTIPTKQTIFFYSDNQPGVLQVYGERAMTKDNNLLGRFELSGIPP<br>APRGVQIEVTFDIDANGILNVTADTKSTGKANKITITNDKGRLSKEEIERM/QVEAEKYAEDEVQRERVSAKNALES<br>YAFNMKSAVEDEGLGKISEADKKKVLDCQEVISWLDANTLAEKDEFEHKRKELEQVCPNISGLYQAGGPGPG<br>GFGAQQ <b>PKGGSQSGPTIEEVD</b>                                                                                                                                                                                                                                                                                                                                                                                          |
| <i>mtDod-PAS-Pep2</i><br>PLEGDDTSTRMEEVD | NP_001017963.2 heat shock<br>protein HSP90-alpha isoform 1<br>[Homo sapiens]                 | MPPCSGGDGTTPGSLRDRDCAQSAEYPRDRDPRGSPSEASSPFLRSAPVNNWYQEAQVFLWHLMV<br>GSTLLCLWKQPFHVSAFPVTASLAFRQSQGAGQHLKYDLPFILLRLLMPEETQTDQDPMEEEVETFAFQAEIA<br>QLMSLIINTFYSNKEIFLRELISNSDALKIRYESLTDPSKLDGSKELHINLIPNKQDRTLTVTDGIGMTKADLNNLGT<br>IAKSGTKAFMEALQAGADISMIGQFVGFYSAYLVAEKVTITKHNDDEQYAWESSAGGSFTVRTDTEGPMGRGT<br>VILHLKEDQTEYLEERRIKKIVKHSQFYGIPITLVEKERDKEVSDDEAEKEDEKKEEKEEKEERPEELCEDVGS<br>EEEEKDKGDKKKKKIKKIKYDQELNKTPIWTRNPDITNEEYGEFYKSLTNDWEDHLAVKHSFVQKLEFRALL<br>FVPRRAPFLFENRKKNNIKLYVRRVFMIDNCEELIPEYLNFRIRGVVDSDELNARFVQKQKAILSPAFK<br>LELFTLAEADKENYKFFYEQFSKNIKLGIHEDSQNRKLSSELLRYTTSASGDEM/SLKDYCTRMKENGKHYYITGT<br>KQGVANSAFVRLRKHVLEVIYMIPIDEYCVQQLKEFEGKTLVSVTKEGLELPEDEEEKKQEKKIFENLCKIMK<br>DILEKKEV/VVSNRLVTPSCCIVTSTYGTWANTMERIMKAQALRDNSTMGYMAAKHLEINPDHSIETLRQKAEAD<br>KNDKSVKDLVILLYETALLSSGFSLEDPQTHANRIYRMILGLGIDEDDPTADDTSAAVTEEMP <b>PLEGDDTSTRMEE</b><br><b>VD</b>                                                                                                                                                                             |
| <i>mtDod-PAS-Pep3</i><br>ECYPNEKNSVNMDDL | NP_006635.2 heat shock protein<br>105 kDa isoform 1<br>[Homo sapiens]                        | MSVVGDLVGSQSCYIIVARAGGIETIANEFSDRCTPSVISFGSKNRTIGVAAKNQOITHANNVSNFKRFHGRFAND<br>PFIQKKEENLSDLVPLKNGGVIKVMYMGEEHLFSVEQITAMLLTKLKETAEVSLKPPVTDVVISVPSFFTDAERRS<br>VLDAAQIVGLNCLRLMNDMTAVANLYGIKQDLPSLDEKPRIVVFDVDMGHSAYQVSAFCANFKGLKVLGATDFPLG<br>GKNFDEKLVHFCAEFKTKYKLDKSKIRALLRLYQCEKLLKLSMNSSTDLPLNIECFMNDKDVSGKMMNRSQFEEL<br>CAELLQKIEVPLYSLEQLTHLKVEDVSAVEIVGGATRIAPAVKERIAKFFGKDSTTLNADAEVARGCALQCAILSPAFK<br>REFSVTDVAVPPIISLWNNHSDSETEGVHEVFSRNHAAFPKSVLTLRLLRQGFLEAFYSDPQVVPYPAEKIGRFVQV<br>VSAQDKGEKSRVKKVVRVNTGIFITASTMVEKVPTEENEMSEADMCELNQRPPENPDTKNRPQDNQSEAGTQ<br>POVQTDAAQQTQSPPSPLETSEENKIPADKANEEKVQDQPEAKPKIKV/VNVELPIEANLWVQLGKDLLNMYIETE<br>GKMIIMQDKLEKERNDAKNAVEEYVFRDGLCGPYEKFICEQDQHNFLRLLTETEDWLYEEGVEDQAKQAYVDKLE<br>ELMKIGTPVVRVQEAERPKMFEELGQRLQHYAKIAADFRNKDEKYNHIDESMCKKVEKNSVEMWEMWMMVNA<br>QAKKSLDQDPVRAQEIKTIKELNNTCEPVVTPQPKKIESPKLERTPNGNPIDKKEEDLEDKNNFGAEPHQNG <b>EG</b><br><b>YPNEKNSVNMDDL</b>                                                                                                                                          |
| <i>mtDod-PAS-Pep4</i><br>VPSDSKKLPEMDID  | EAW62295.1 heat shock 70kDa<br>protein 4, isoform CRA_b<br>[Homo sapiens]                    | MSVVGIDLGFQSCYIIVARAGGIETIANEYSDRCTPACISFGPKNRSIGAAAKSQVISNAKNTVQGFKRFHGRFAND<br>PFVAEKSNLADIVQLPTGLTGIVTYMEERNFTEQVNTAMLLSKLKETAEVSLKPPVTDVVISVPSFFTDAERRS<br>SVMDATQIAGLNLRLMNETTAVALAYGIKQDLPALEEKPRNVVFDVDMGHSAYQVSAFCANFKGLKVLGATDFDT<br>LGGKRFDEVLVNHFCDEFKTKYKLDKSKIRALLRLYQCEKLLKLSMNSSTDLPLNIECFMNDKDVSGKMMNRSQFEEL<br>EMCNDLLARVEPPLRSLVLEQTKLKEFIDYVAVIIVGGATRIAPAVKERIAKFFGKDSTTLNADAEVARGCALQCAILSPAFK<br>FKVREFSITDVPYPIISLWNNHSDSETEGVHEVFSRNHAAFPKSVLTLRLLRQGFLEAFYSDPQVVPYPAEKIGRFVQV<br>VDQVEEPHVEEQQQTPAENKAEESEMETSQAGSKDKKMDQPPQAKKAVKVTSTVDLPIENQLLWQIDREMLNLYI<br>ENEGKMIIMQDKLEKERNDAKNAVEEYVFRDGLCGPYEKFICEQDQHNFLRLLTETEDWLYEEGVEDQAKQAYVDKLE<br>DKLAEKLNKLGQPIKIRFQSEERPKLFEELGKQIQQYMKIISFFKNKEDQYDHLDAADMTGQVEKSTNEAMEWMMNKL<br>NLQNKQSLTMDPVVRSKEIEAKIKELTSTCSPISKPKPKVEPPKEEQKNAEQNGPVGQDGNPFGAAEQWQDSTA<br><b>VPSDSKKLPEMDID</b>                                                                                                                                                                                                              |
| <i>mtDod-PAS-Pep5</i><br>DSSQHTKSSGEMEVD | NP_055093.2 heat shock 70 kDa<br>protein 4L isoform 1<br>[Homo sapiens]                      | MSVVGIDLGFNLCYIIVARAGGIETIANEYSDRCTPACISLGRSRTAIGNAAKSQIVTVNVRTIHGIFKHLGRSFDPI<br>VQTERIRLPELQKMPNGSAGVKRYLEEEERPFVIEQVGTMLLAKLKETSENAIKKPVADCVISVPSFFTDAERRS<br>MAAAQVAGLNLRLMNETTAVALAYGIKQDLPALEEKPRNVVFDVDMGHSAYQVSAFCANFKGLKVLGATDFDT<br>GRNFDEALVDYFCDEFKTKYKLDKSKIRALLRLYQCEKLLKLSMNSSTDLPLNIECFMNDKDVSGKMMNRSQFEEL<br>LCASLLARVEPPLKAVMEQANLQREDISSIEVGGATRIAPAVKQITKFFLKDISTTLNADAEVARGCALQCAILSPAFK<br>VREFSITDLPVYPIISLWNNHSDSETEGVHEVFSRNHAAFPKSVLTLRLLRQGFLEAFYSDPQVVPYPAEKIGRFVQV<br>FPQSDGSSKVKVVRVNIHGFISVASASVIEKQNLGEGDHPDAPMETETSTFNKNEKNDMDKMDQVDEEGHQKCHA<br>EHTPEEIIDHTGAKTKSAVSDKQDRLNQLTKGKVKSIDLPQSSLCRQLGQDLNLSYENEGKMIIMQDKLEKERN<br>AKNAVEEYVFRDGLCGPYEKFICEQDQHNFLRLLTETEDWLYEEGVEDQAKQAYVDKLE<br>EERPKALNDLGGKIQLVKVIAYRNKDERYDHLDPTEMEKVEKCSIDAMS/LNKSMMNAQKSLTQDPVYVYVSEI<br>VAKSKELDNFCNPIYKPKPAEVPEDKPKANSEHNGPMDGQSGTETKSDSTK <b>DSSQHTKSSGEMEVD</b>                                                                                                                                                                                       |
| <i>mtDod-PAS-Pep6</i><br>EQSGTKRPLKNDEL  | XP_005271449.1 hypoxia up-<br>regulated protein 1 isoform X1<br>[Homo sapiens]               | MADKVRQRPRRRVAVLAVLLADLSDTLAVMSVDLGSSEMKVAVKPGVMEIVLNKESRRRKTPTVITLKE<br>NERFFGDSAAASMAIKNPKATLRYFQHLGKQADNPHVALYQARFPEHELFDNDPQRQTVHFQISSQLDFSPVEVLGM<br>VLNYSRSLAEDFAEQPKDAVITVFFVFNQAERRAVLQAARMAGLKVLQLINDNTATLSYGVFRKQDINTAFQIMF<br>YDMGSGSTVCTIVTYQMVKTKEAGMOPQLQIRVGFDRTLGGLEMELRLRERLAGLFNEQRKQGRAKDVRNPR<br>AMAKLLREANRLKTVLSANADHMAQIEGLMDDVDFKAKVTRVEFEELCADLFRVPGPVQALQSAEMLSDIEIQV<br>ILVGGATRVPRVQEVLLKAVGKEELGKNINADAAAMGAVYQAAALSFAFKVFPVVRDADVPIVVEFTREVEEPEP<br>GIHSLKHNKRVLSFRMGYPYQKRVITFNRYSHDFNFHINYGDLGFLGPEDLRFVGSQNLTTVKLKGVDGDSFKKYPD<br>YESKGIKAHFNLDSESVLSDRVESVFTLVEDSAEEESTLTKLGNITSSLFGGGTTPDAKENGTDVTEQEEESPAE<br>GSKDEPGEQVELKEEAEPVDEGSPPPPEPKGDATPEGEKATEKENGDKSEAKQPSKAEAGPEGVAPAPEGE<br>KKQKPAKRMRMVEEIGVELVLDLDPDPEDKLAQSVQKQLDRLDRLEKEREKNAENLEAFIFETQDKLYQPEYQE<br>VSTEEQREIEISGLSAASTWLEDEGVGATTVMLKEKLAELRKLQGLFFRVEERKWPERSALDNLNHSMSFLK<br>GARLIPEMDQIFTEVEMTTLEKVINETAWKNA/LAEQAKLPATEKPVLLSKDIEAKMMALDREVQYLLNKAQKFTK<br>RPRPKDKNGTAEPLNASASDQGEKVPVPPAGQTEDEAEPSEPEKVTAGSEPGDTEPLELGGGPAEPEK <b>EQST</b><br><b>GQKRPLKNDEL</b> |
| <i>mtDod-PAS-Pep8</i><br>LVTGESLEQLRRGLA | sp Q09118.1 HBEFG_CHLAE                                                                      | MKLLPSVVLKLLAAVLSA <b>LVTGESLEQLRRGLA</b> AGTSNPDPSTGSDQLLRLGGGRDRKVRDLQEAIDLRLVTL<br>SSKQALATPSKEEHGKRKKKGLGKGRDPCRLRYKDFCIHGECKYVVELRAPSCICHPYHGERCHGLSLPVE<br>NRLTYDHTTILAVVAVLSSVCLLVIVGLLMFRYHRRGGYDVENEKVKLGMNTSH                                                                                                                                                                                                                                                                                                                                                                                                                                                                                                                                                                                                                                                                                                                                                                                                                                                       |
| <i>mtDod-PAS-Pep9</i><br>MKGKKEEGGARLGA  | NP_005852.2 E3 ubiquitin-<br>protein ligase CHIP isoform a<br>[Homo sapiens]                 | <b>MKGKKEEGGARLGA</b> GGGSPEKPSAQELKEQGNRLFVGRKYPEAAACYGRAITRNPLVAVVYTNRALCYLKM<br>QHEQALADCRRALELDGQSVKAHFFLGGCQLEMESYDEAIANLQRAYSLAKEQRLNFDDIP/SALRIAKKRWNSI<br>EERRIHQESLH/SYLSRLIAAERERELEECQRNHEGDEDDSHVRAQQACIEAKHDKY/MADMDELFSQVDEKRRKR<br>DIPDYLCGKISFELMREPCITPSGITVDRKDIEEHLQVRVGHFDPVTRSPLTQEQLIPLNLAKEVIDAFISENGWVEDY                                                                                                                                                                                                                                                                                                                                                                                                                                                                                                                                                                                                                                                                                                                                             |
| <i>mtDod-PAS-Pep10</i><br>EERRIHQESE     | NP_005852.2 E3 ubiquitin-<br>protein ligase CHIP isoform a<br>[Homo sapiens]<br>Pos. 151-160 | MKGKKEEGGARLGA <b>GGGSPEKPSAQELKEQGNRLFVGRKYPEAAACYGRAITRNPLVAVVYTNRALCYLKM</b><br>QHEQALADCRRALELDGQSVKAHFFLGGCQLEMESYDEAIANLQRAYSLAKEQRLNFDDIP/SALRIAKKRWNSI<br><b>EERRIHQESE</b> LH/SYLSRLIAAERERELEECQRNHEGDEDDSHVRAQQACIEAKHDKY/MADMDELFSQVDEKRRKR<br>DIPDYLCGKISFELMREPCITPSGITVDRKDIEEHLQVRVGHFDPVTRSPLTQEQLIPLNLAKEVIDAFISENGWVEDY                                                                                                                                                                                                                                                                                                                                                                                                                                                                                                                                                                                                                                                                                                                                    |
| <i>mtDod-PAS-Pep11</i><br>NHEGDEDDSH     | NP_005852.2 E3 ubiquitin-<br>protein ligase CHIP isoform a<br>[Homo sapiens]<br>Pos. 183-192 | MKGKKEEGGARLGA <b>GGGSPEKPSAQELKEQGNRLFVGRKYPEAAACYGRAITRNPLVAVVYTNRALCYLKM</b><br>QHEQALADCRRALELDGQSVKAHFFLGGCQLEMESYDEAIANLQRAYSLAKEQRLNFDDIP/SALRIAKKRWNSI<br>EERRIHQESLH/SYLSRLIAAERERELEECQR <b>NHEGDEDDSH</b> VRAQQACIEAKHDKY/MADMDELFSQVDEKRRKR<br>DIPDYLCGKISFELMREPCITPSGITVDRKDIEEHLQVRVGHFDPVTRSPLTQEQLIPLNLAKEVIDAFISENGWVEDY                                                                                                                                                                                                                                                                                                                                                                                                                                                                                                                                                                                                                                                                                                                                    |

**Literature:**

1. Golovanov, A. P., Hautbergue, G. M., Wilson, S. A. & Lian, L.-Y. A Simple Method for Improving Protein Solubility and Long-Term Stability. *J. Am. Chem. Soc.* **126**, 8933–8939 (2004).
2. Bajar, B. T. *et al.* Improving brightness and photostability of green and red fluorescent proteins for live cell imaging and FRET reporting. *Sci. Rep.* **6**, (2016).
3. Veggiani, G. *et al.* Programmable polyproteins built using twin peptide superglues. *Proc. Natl. Acad. Sci.* **113**, 1202–1207 (2016).
4. Kick, A., Bönsch, M. & Mertig, M. EGNAS: an exhaustive DNA sequence design algorithm. *BMC Bioinformatics* **13**, 138 (2012).
